# Supplementary material for: Molecular Surveillance of Aggressive Large B-cell Lymphoma using Circulating Tumor DNA Duplexes
Source: Research Square preprint supplement (doi:10.21203/rs.3.rs-8007791/v1), 2025-11-13

## Supplementary Material

### Molecular Surveillance of Aggressive Large B-cell Lymphoma using Circulating Tumor DNA Duplexes

Leo Meriranta<sup>1,2</sup>, Maare Arffman<sup>1,2</sup>, Matias Autio<sup>1-3</sup>, Judit Jørgensen<sup>4</sup>, Marja-Liisa Karjalainen-Lindsberg<sup>3</sup>, Klaus Beiske<sup>5,6</sup>, Mette Pedersen<sup>7,8</sup>, Kristina Drott<sup>9</sup>, Øystein Fluge<sup>10</sup>, Sirkku Jyrkkö<sup>11</sup>, Peter Brown<sup>12</sup>, Harald Holte<sup>13,14</sup>, Sirpa Leppä<sup>1,2</sup>

<sup>1</sup>Research Programs Unit, Applied Tumor Genomics, University of Helsinki, Helsinki, Finland

<sup>2</sup>Department of Oncology, Helsinki University Hospital Comprehensive Cancer Centre, Helsinki, Finland

<sup>3</sup>Department of Pathology, Helsinki University Hospital, Helsinki, Finland

<sup>4</sup>Department of Hematology, Aarhus University Hospital, Aarhus, Denmark

<sup>5</sup>Department of Pathology, Oslo University Hospital, Oslo, Norway

<sup>6</sup>Institute of Clinical Medicine, Medical Faculty, University of Oslo, Oslo, Norway

<sup>7</sup>Department of Pathology, Zealand University Hospital, Roskilde, Denmark

<sup>8</sup>Department of Clinical Medicine, Faculty of Health and Medical Sciences, University of Copenhagen

<sup>9</sup>Department of Oncology, Skane University Hospital, Lund, Sweden

<sup>10</sup>Department of Oncology, Haukeland University Hospital, Bergen, Norway

<sup>11</sup>Department of Oncology, Turku University Hospital, Turku, Finland

<sup>12</sup>Department of Hematology, Rigshospitalet, Copenhagen, Denmark

<sup>13</sup>Department of Oncology, Oslo University Hospital, Oslo, Norway

<sup>14</sup>KG Jebsen Centre for B-cell malignancies, Oslo, Norway

**Running head:** Circulating tumor DNA monitoring in B-cell lymphomas

**Key words:** Circulating tumor DNA, duplex sequencing, measurable residual disease, B-cell lymphoma, surveillance, relapse, longitudinal

## Supplementary Table Legends

**Table S1.** List of resources and reagents used in the study.

**Table S2.** Confusion matrixes of the MRD test results and clinical end points with related statistics in the measured time-points on-therapy.

**Table S3.** Cox regression univariable models according to on-therapy ctDNA risk factors.

**Table S4A-B.** Sequencing metrics and measurable residual disease assessments of the study samples.

## Supplementary Figure Legends and Figures

**Figure S1.** Prognostic significance of circulating tumor DNA (ctDNA) detection in serial samples collected during chemoimmunotherapy.

- A) Kaplan-Meier (KM) survival estimates for progression-free survival (PFS) according to presence of measurable residual disease (MRD) after two cycles of therapy.
- B) KM survival estimates for PFS among evaluable MRD<sup>CYC2+</sup> patients according to MRD after four cycles (n=27)
- C) KM survival estimates for PFS according to EOT MRD.
- D) Sankey plot of study patients at EOT according to Deauville scores, MRD<sup>EOT</sup> and relapse status on follow-up (FU). Numbers in bold indicate the number of patients per group.
- E) KM survival estimates for PFS according to EOT MRD among the patients with complete metabolic response (Deauville score [D-S] 1-3).
- F) KM survival estimates for PFS according to EOT MRD among the patients with incomplete metabolic response (D-S 4-5).
- G) Sankey plot of the study patients at EOT according to radiotherapy (RT) administration status, RT indications, MRD<sup>EOT</sup> and relapse status on FU. Numbers in bold indicate the number of patients per group.

Figure S1.

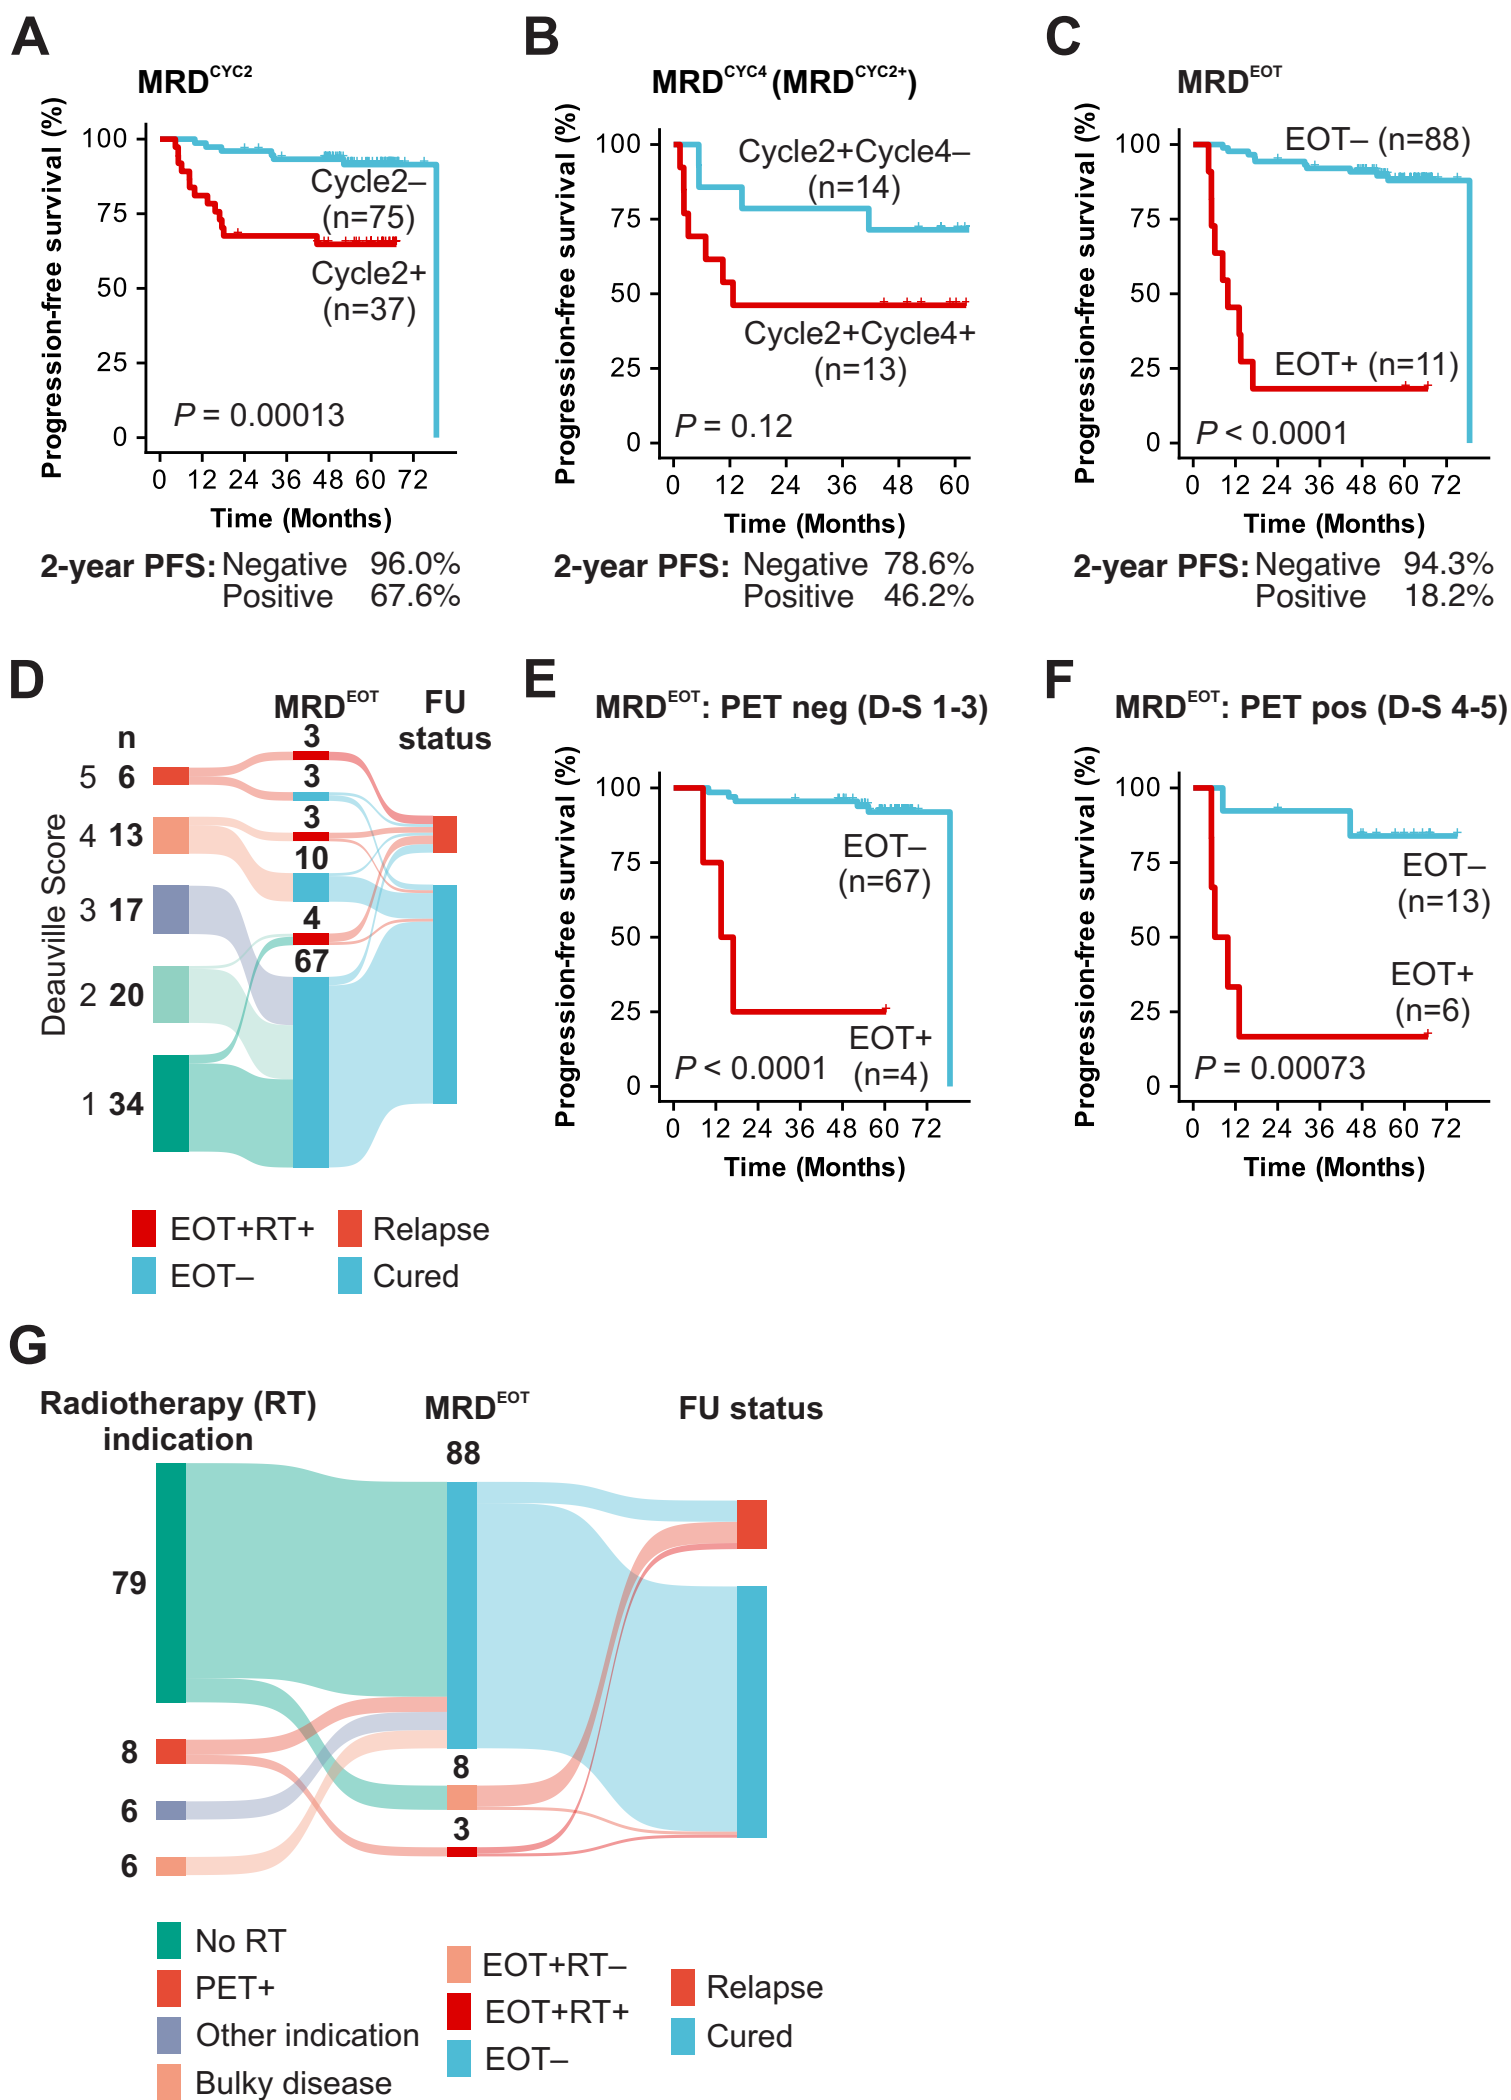

Supplement: Supplementary file 1 [file c7d59b2339b7fda6702afede.pdf]
