# Supplementary material for: Molecular Surveillance of Aggressive Large B-cell Lymphoma using Circulating Tumor DNA Duplexes
Source: Research Square preprint supplement (doi:10.21203/rs.3.rs-8007791/v1), 2025-11-13
Supplement: Supplementary file 1 [file 2908d382b585641e6c072ea4.xlsx]

## Sheet: Table_S1
Table S1. List of resources and reagents used in the study.
Reagent	Source	Identifier
Reagents and Kits
QIAamp DNA Blood Midi Kit	Qiagen	Cat# 51185
Qiaseq All-in-one kit	Qiagen	Cat# 180025
QIAamp DNA FFPE Advanced UNG Kit	Qiagen	Cat# 56704
Twist Library Preparation EF Kit 2.0	Twist Bioscience	Cat# 104207
xGen CS (Duplex Seq) Adapters (Tech access)	Integrated DNA Technologies	Cat# 1080799
xGen UDI Primer pairs	Integrated DNA Technologies	Cat# 10005922
QuantStudio 5 Collibri Library Quantification kit	Thermo Fisher Scientific	A38524500
Quant-iT PicoGreen dsDNA Assay	Thermo Fisher Scientific	P7589
Qubit dsDNA BR Assay	Thermo Fisher Scientific	Q32853
Custom gene panel	Twist Bioscience	DOI:10.1182/bloodadvances.2025015791 Supplemental Table 1
Instruments
NovaSeq6000	Illumina	ver 1.5 chemistry
LabChip GX Touch HT High Sensitivity assay	PerkinElmer
Software
Dragen Somatic	Illumina	4.0.3–4.2.4
R	R Project	Versions 3.6.1, 4.4.3
Patients, clinical data, samples
NLG-LBC-06 (Bio-CHIC)	Nordic Lymphoma Group	NCT01325194

## Sheet: Table_S2
Table S2. Confusion matrixes of the MRD test results and clinical end points with related statistics in the measured time-points on-therapy.
MRD After 2 cycles (n=112)
PFS				RFS				OS
	PFS event				Relapse				Death
MRD	No	Yes		MRD	No	Yes		MRD	No	Yes
negative	68	7		negative	71	4		negative	73	2
positive	24	13		positive	25	12		positive	27	10
	Accuracy	0.7232			Accuracy	0.7411			Accuracy	0.7411
	95% CI	(0.6307, 0.8036)			95% CI	(0.6497, 0.8192)			95% CI	(0.6497, 0.8192)
	No Information Rate	0.8214			No Information Rate	0.8571			No Information Rate	0.8929
	P-Value [Acc > NIR]	0.996442			P-Value [Acc > NIR]	0.999607			P-Value [Acc > NIR]	1
	Kappa	0.292			Kappa	0.3165			Kappa	0.2939
	Mcnemar's Test P-Value	0.004057			Mcnemar's Test P-Value	0.0002041			Mcnemar's Test P-Value	8.324e-06
	Sensitivity	0.65			Sensitivity	0.75			Sensitivity	0.83333
	Specificity	0.7391			Specificity	0.7396			Specificity	0.73
	Pos Pred Value	0.3514			Pos Pred Value	0.3243			Pos Pred Value	0.27027
	Neg Pred Value	0.9067			Neg Pred Value	0.9467			Neg Pred Value	0.97333
	Prevalence	0.1786			Prevalence	0.1429			Prevalence	0.10714
	Detection Rate	0.1161			Detection Rate	0.1071			Detection Rate	0.08929
	Detection Prevalence	0.3304			Detection Prevalence	0.3304			Detection Prevalence	0.33036
	Balanced Accuracy	0.6946			Balanced Accuracy	0.7448			Balanced Accuracy	0.78167
Major Molecular Response (MMR, ≥ 2.5 log FC in ctDNA level after 2 cycles)
PFS				RFS				OS
	PFS event				Relapse				Death
MMR	No	Yes		MMR	No	Yes		MMR	No	Yes
no	82	12		no	86	8		no	88	6
yes	9	8		yes	9	8		yes	11	6
	Accuracy	0.8108			Accuracy	0.8468			Accuracy	0.8468
	95% CI	(0.7255, 0.8789)			95% CI	(0.7661, 0.9082)			95% CI	(0.7661, 0.9082)
	No Information Rate	0.8198			No Information Rate	0.8559			No Information Rate	0.8919
	P-Value [Acc > NIR]	0.6528			P-Value [Acc > NIR]	0.6671			P-Value [Acc > NIR]	0.9477
	Kappa	0.3198			Kappa	0.395			Kappa	0.3287
	Mcnemar's Test P-Value	0.6625			Mcnemar's Test P-Value	1			Mcnemar's Test P-Value	0.332
	Sensitivity	0.4			Sensitivity	0.5			Sensitivity	0.5
	Specificity	0.9011			Specificity	0.90526			Specificity	0.88889
	Pos Pred Value	0.47059			Pos Pred Value	0.47059			Pos Pred Value	0.35294
	Neg Pred Value	0.87234			Neg Pred Value	0.91489			Neg Pred Value	0.93617
	Prevalence	0.18018			Prevalence	0.14414			Prevalence	0.10811
	Detection Rate	0.07207			Detection Rate	0.07207			Detection Rate	0.05405
	Detection Prevalence	0.15315			Detection Prevalence	0.15315			Detection Prevalence	0.15315
	Balanced Accuracy	0.65055			Balanced Accuracy	0.70263			Balanced Accuracy	0.69444
MRD after 4 cycles (MRD CYCLE2+, n=27)
PFS				RFS				OS
	PFS event				Relapse				Death
MRD	No	Yes		MRD	No	Yes		MRD	No	Yes
negative	10	4		negative	10	4		negative	12	2
positive	6	7		positive	6	7		positive	7	6
	Accuracy	0.6296			Accuracy	0.6296			Accuracy	0.6667
	95% CI	(0.4237, 0.806)			95% CI	(0.4237, 0.806)			95% CI	(0.4604, 0.8348)
	No Information Rate	0.5926			No Information Rate	0.5926			No Information Rate	0.7037
	P-Value [Acc > NIR]	0.4273			P-Value [Acc > NIR]	0.4273			P-Value [Acc > NIR]	0.7417
	Kappa	0.2541			Kappa	0.2541			Kappa	0.3231
	Mcnemar's Test P-Value	0.7518			Mcnemar's Test P-Value	0.7518			Mcnemar's Test P-Value	0.1824
	Sensitivity	0.6364			Sensitivity	0.6364			Sensitivity	0.75
	Specificity	0.625			Specificity	0.625			Specificity	0.6316
	Pos Pred Value	0.5385			Pos Pred Value	0.5385			Pos Pred Value	0.4615
	Neg Pred Value	0.7143			Neg Pred Value	0.7143			Neg Pred Value	0.8571
	Prevalence	0.4074			Prevalence	0.4074			Prevalence	0.2963
	Detection Rate	0.2593			Detection Rate	0.2593			Detection Rate	0.2222
	Detection Prevalence	0.4815			Detection Prevalence	0.4815			Detection Prevalence	0.4815
	Balanced Accuracy	0.6307			Balanced Accuracy	0.6307			Balanced Accuracy	0.6908
MRD End-of-therapy (n=99)
PFS				RFS				OS
	PFS event				Relapse				Death
MRD	No	Yes		MRD	No	Yes		MRD	No	Yes
negative	77	11		negative	81	7		negative	85	3
positive	2	9		positive	2	9		positive	3	8
	Accuracy	0.8687			Accuracy	0.9091			Accuracy	0.9394
	95% CI	(0.7859, 0.9282)			95% CI	(0.8344, 0.9576)			95% CI	(0.8727, 0.9774)
	No Information Rate	0.798			No Information Rate	0.8384			No Information Rate	0.8889
	P-Value [Acc > NIR]	0.04672			P-Value [Acc > NIR]	0.03144			P-Value [Acc > NIR]	0.06705
	Kappa	0.5105			Kappa	0.6161			Kappa	0.6932
	Mcnemar's Test P-Value	0.0265			Mcnemar's Test P-Value	0.18242			Mcnemar's Test P-Value	1
	Sensitivity	0.45			Sensitivity	0.5625			Sensitivity	0.72727
	Specificity	0.97468			Specificity	0.9759			Specificity	0.96591
	Pos Pred Value	0.81818			Pos Pred Value	0.81818			Pos Pred Value	0.72727
	Neg Pred Value	0.875			Neg Pred Value	0.92045			Neg Pred Value	0.96591
	Prevalence	0.20202			Prevalence	0.16162			Prevalence	0.11111
	Detection Rate	0.09091			Detection Rate	0.09091			Detection Rate	0.08081
	Detection Prevalence	0.11111			Detection Prevalence	0.11111			Detection Prevalence	0.11111
	Balanced Accuracy	0.71234			Balanced Accuracy	0.7692			Balanced Accuracy	0.84659

## Sheet: Table_S3
Table S3. Cox regression univariable models according to ctDNA risk factors on-therapy. HR, hazard ratio; CI, confidence interval; PFS, progression-free survival; RFS, relapse-free survival; OS, overall survival; CYCLE2+, ctDNA detected after 2 cycles; CYCLE4+, ctDNA detected after 4 cycles; EOT+, ctDNA detected after therapy; MMR–, major molecular response not reached.
Variable	Endpoint	HR	95% CI		P-value
			Lower	Upper
CYCLE2+	PFS	5.38	2.043	14.17	0.00066
n = 112	RFS	7.305	2.353	22.67	0.00058
	OS	11.402	2.496	52.07	0.00169
MMR–	PFS	7.3665	2.333	23.26	0.000664
n = 111	RFS	9.6636	2.894	32.27	0.000227
	OS	6.4507	1.245	33.41	0.0263
CYCLE4+	PFS	3.496	1.343	9.097	0.0103
n = 55	RFS	4.4039	1.59	12.2	0.00434
(all tested)	OS	8.285	2.135	32.15	0.00224
CYCLE4+	PFS	2.5624	0.7467	8.793	0.135
n = 27	RFS	2.5624	0.7467	8.793	0.135
(CYCLE2+)	OS	8.342	1	69.55	0.05
EOT+	PFS	18.7038	7.338	47.67	8.51e-10
n = 99	RFS	24.9581	8.946	69.63	7.94e-10
	OS	65.4563	13.39	320	2.41e-07

## Sheet: Table_S4A
Table S4A. Sample specific sequencing metrics.
Identifier	Material	Timepoint	Library_preparation_kit	Input (nanograms)	PCR_cycles	Post_PCR_cycles	Capture_pool_name	Capture_input_ng	# reads	% GC	mean insert size	# reads for alignment	# reads mapping to reference	% reads mapping to reference	# mismatch bases r1	% mismatch bases r1	# mismatch bases r2	% mismatch bases r2	# target mean umi family depth	# on target reads	% on target reads	# median target coverage	% coverage uniformity (>20% of the mean)	% target/genome 10x coverage	% target/genome 20x coverage	% target/genome 30x coverage	% target/genome 50x coverage	% target/genome 100x coverage	% target/genome 250x coverage
identifier#1	EDTA_plasma	CYC2	Qiaseq_cfDNA	100	8	11	BioCHICseq_2_plate1_pool11	139	354643146	53.27	170	354759776	353915043	99.76	55911200	0.31	60657596	0.34	3.84	48832334	62.85	5494	99.3	99.78	99.75	99.73	99.7	99.68	99.66
identifier#2	EDTA_plasma	CYC4	Qiaseq_cfDNA	100	8	11	BioCHICseq3_pool3	187.5	224365004	52.75	173.29	224798682	223821229	99.57	33768132	0.3	36956244	0.33	3.24	33748203	64.96	3796	98.9	99.53	99.49	99.47	99.45	99.41	99.34
identifier#3	EDTA_plasma	EOT	Qiaseq_cfDNA	36.015	8	11	BioCHICseq_2_plate1_pool1	187.5	193106152	52.44	170	193156554	192796278	99.81	29821117	0.31	30455317	0.31	4.6	23299493	60.72	2640	99.29	99.75	99.72	99.69	99.67	99.65	99.59
identifier#4	EDTA_plasma	CYC2	Qiaseq_cfDNA	28.7457	8	11	BioCHICseq_2_plate1_pool11	187.5	72604302	54.53	210	72625760	72390205	99.68	12251598	0.33	15064331	0.41	3.8	9705163	60.64	1077	99.25	99.97	99.94	99.92	99.87	99.77	99.13
identifier#5	EDTA_plasma	CYC4	Qiaseq_cfDNA	100	8	11	BioCHICseq3_pool3	187.5	71987462	52.82	171.25	72150328	71802598	99.52	10933626	0.3	12491267	0.35	2.9	11134703	66.07	1264	98.71	99.58	99.53	99.49	99.44	99.28	98.75
identifier#6	EDTA_plasma	EOT	Qiaseq_cfDNA	26.4494	8	11	BioCHICseq_2_plate1_pool1	187.5	128512076	52.25	168	128558506	128278070	99.78	20388231	0.31	20947970	0.32	4.61	15475630	60.94	1782	99.12	99.75	99.7	99.67	99.64	99.58	99.34
identifier#7	EDTA_plasma	EOT	Qiaseq_cfDNA	11.8754	8	11	BioCHICseq_2_plate1_pool1	187.5	133162780	51.67	185	133191838	132941188	99.81	19751739	0.29	21004500	0.31	7.45	10014177	53.8	1149	99.18	99.91	99.88	99.87	99.85	99.68	99.12
identifier#8	EDTA_plasma	CYC2	Qiaseq_cfDNA	85.7733	8	11	BioCHICseq_2_plate1_pool11	187.5	122733324	53.53	196	122766730	122408322	99.71	20362749	0.33	22633614	0.37	3.23	18071554	62.31	2003	99.03	99.86	99.82	99.8	99.75	99.66	99.33
identifier#9	EDTA_plasma	CYC4	Qiaseq_cfDNA	92	8	11	BioCHICseq3_pool3	187.5	78618672	52.65	217.28	78798398	78391544	99.48	12196615	0.31	14016968	0.36	3.1	11872675	64.54	1333	98.6	99.38	99.33	99.3	99.26	99.13	98.7
identifier#10	EDTA_plasma	EOT	Qiaseq_cfDNA	6.29634	8	11	BioCHICseq_2_plate1_pool1	187.5	107476648	51.39	167	107506584	107301924	99.81	16947856	0.31	17223290	0.32	10.79	5676556	50.6	643	99.05	99.5	99.45	99.43	99.36	99.15	97.64
identifier#11	EDTA_plasma	CYC2	Qiaseq_cfDNA	100	8	11	BioCHICseq_2_plate1_pool11	187.5	175128558	54.66	164	175172640	174849363	99.82	29714646	0.34	29268516	0.33	3.13	27014325	65.35	2990	99.1	99.75	99.67	99.65	99.63	99.6	99.54
identifier#12	EDTA_plasma	EOT	Qiaseq_cfDNA	29.8472	8	11	BioCHICseq_2_plate1_pool1	187.5	122858234	52.88	167	122886724	122672128	99.83	20471280	0.33	20799469	0.34	4.06	16356463	62.24	1833	99.24	99.74	99.67	99.65	99.64	99.58	99.47
identifier#13	EDTA_plasma	CYC2	Qiaseq_cfDNA	80.4984	8	11	BioCHICseq_2_plate1_pool12	187.5	140783702	52.73	242	140813732	140428041	99.73	22778746	0.32	27552946	0.39	3.7	18392250	57.82	2045	99.42	99.95	99.95	99.95	99.92	99.9	99.79
identifier#14	EDTA_plasma	EOT	Qiaseq_cfDNA	84	8	11	BioCHICseq3_pool10	187.5	122458968	51.96	214.06	122734852	122141660	99.52	18713822	0.31	20631358	0.34	3.57	16836522	61.45	1908	98.16	99.56	99.5	99.46	99.43	99.35	99
identifier#15	EDTA_plasma	CYC2	Qiaseq_cfDNA	100	8	11	BioCHICseq_2_plate1_pool12	150.62	339541404	54.98	200	339656732	338622964	99.7	58416493	0.34	66847990	0.39	3.94	42741779	58.21	4592	99.2	99.92	99.91	99.9	99.89	99.86	99.8
identifier#16	STRECK_plasma	EOT	Qiaseq_cfDNA	28.1462	8	11	BioCHICseq_2_plate1_pool1	187.5	111734048	52.17	212	111782102	111476650	99.73	16766241	0.3	18921193	0.34	5.04	12185613	58.29	1384	99.23	99.92	99.9	99.88	99.83	99.69	99.31
identifier#17	STRECK_plasma	CYC2	Qiaseq_cfDNA	29.6312	8	11	BioCHICseq_2_plate1_pool12	187.5	71915938	51.48	230	71930654	71751939	99.75	10728767	0.3	12632619	0.35	4.4	8511369	57.51	965	99.26	99.99	99.99	99.96	99.92	99.72	98.85
identifier#18	STRECK_plasma	CYC4	Qiaseq_cfDNA	100	8	11	BioCHICseq3_pool3	187.5	78422308	52.36	227.27	78575144	78218764	99.55	11389816	0.29	13559385	0.35	2.85	11720854	64.26	1319	98.46	99.55	99.5	99.48	99.45	99.31	98.58
identifier#19	STRECK_plasma	EOT	Qiaseq_cfDNA	33.9503	8	11	BioCHICseq_2_plate1_pool2	187.5	130076464	51.11	243	130112480	129775834	99.74	19786788	0.3	23606451	0.36	5.84	11517601	51.68	1307	99.33	100	100	99.99	99.96	99.87	99.38
identifier#20	STRECK_plasma	CYC2	Qiaseq_cfDNA	25.4056	8	11	BioCHICseq_2_plate1_pool12	187.5	61346024	52.59	169	61368406	61221584	99.76	8814690	0.28	9206774	0.3	4.19	7866923	61.39	900	99.09	99.65	99.56	99.53	99.48	99.36	98.75
identifier#21	STRECK_plasma	CYC2	Qiaseq_cfDNA	61.2381	8	11	BioCHICseq_2_plate1_pool12	187.5	97331538	52.65	206	97363346	97078594	99.71	15317961	0.31	17865310	0.37	3.97	12710946	60.11	1438	99.18	99.98	99.95	99.93	99.89	99.78	99.34
identifier#22	EDTA_plasma	CYC2	Qiaseq_cfDNA	46.4167	8	11	BioCHICseq_2_plate1_pool12	187.5	156863926	52.66	180	156908158	156582559	99.79	22787292	0.29	23240587	0.29	3.7	21824300	61.44	2460	99.27	99.92	99.89	99.88	99.85	99.74	99.57
identifier#23	EDTA_plasma	CYC4	Qiaseq_cfDNA	100	8	11	BioCHICseq3_pool3	187.5	181804918	52.72	171.11	182215446	181355732	99.53	26522904	0.29	28826378	0.32	3.11	27874537	65.68	3186	98.82	99.6	99.55	99.53	99.51	99.48	99.34
identifier#24	EDTA_plasma	EOT	Qiaseq_cfDNA	32.7446	8	11	BioCHICseq_2_plate1_pool2	187.5	132390352	53.27	199	132424132	132140814	99.79	20315434	0.3	21395697	0.32	4.78	14780798	57.47	1690	99.36	99.98	99.97	99.97	99.96	99.88	99.55
identifier#25	EDTA_plasma	CYC2	Qiaseq_cfDNA	38.4906	8	11	BioCHICseq_2_plate1_pool12	187.5	98688732	53.12	165	98710696	98511492	99.8	15723342	0.32	16507524	0.33	3.55	14232997	62.93	1587	99.1	99.68	99.62	99.6	99.57	99.51	99.27
identifier#26	EDTA_plasma	EOT	Qiaseq_cfDNA	63.7371	8	11	BioCHICseq_2_plate1_pool2	187.5	205036674	53.28	206	205090296	204611439	99.77	33730525	0.33	36340965	0.35	4.43	23587451	56.4	2653	99.27	99.99	99.98	99.97	99.94	99.9	99.72
identifier#27	STRECK_plasma	CYC2	Qiaseq_cfDNA	49.7913	8	11	BioCHICseq_2_plate1_pool12	187.5	101771328	52.64	199	101796770	101565480	99.77	16245816	0.32	17200776	0.34	3.69	14139816	61.39	1617	99	99.89	99.87	99.85	99.8	99.64	99.28
identifier#28	STRECK_plasma	EOT	Qiaseq_cfDNA	12.1433	8	11	BioCHICseq_2_plate1_pool2	187.5	104116616	53.02	171	104148840	103894730	99.76	17265977	0.33	18534448	0.35	7.12	7786523	52.23	910	98.92	99.63	99.56	99.53	99.49	99.39	97.87
identifier#29	STRECK_plasma	CYC2	Qiaseq_cfDNA	34.621	8	11	BioCHICseq_2_plate2_pool1	187.5	82778578	52.76	174	82798020	82634860	99.8	12769228	0.31	13737120	0.33	4.21	10778615	62.44	1243	98.75	99.78	99.71	99.67	99.59	99.4	98.71
identifier#30	STRECK_plasma	EOT	Qiaseq_cfDNA	49.5209	8	11	BioCHICseq_2_plate1_pool2	187.5	166308832	52.74	171	166358024	165997954	99.78	26156271	0.31	27700250	0.33	4.4	19836174	58.32	2275	99.12	99.7	99.67	99.65	99.63	99.59	99.44
identifier#31	EDTA_plasma	CYC2	Qiaseq_cfDNA	100	8	11	BioCHICseq_2_plate2_pool1	187.5	163095230	54.21	172	163131854	162876811	99.84	22668663	0.28	23464742	0.29	3.35	25566072	66.45	2928	98.91	99.8	99.76	99.71	99.68	99.64	99.51
identifier#32	EDTA_plasma	CYC2	Qiaseq_cfDNA	100	8	11	BioCHICseq_2_plate2_pool1	187.5	153948230	52.86	169	153989424	153691854	99.81	23965710	0.31	25258079	0.33	3.49	22812451	64.02	2609	98.93	99.79	99.75	99.73	99.69	99.65	99.46
identifier#33	EDTA_plasma	CYC2	Qiaseq_cfDNA	48	8	11	BioCHICseq3_pool2	187.5	90869610	52.12	229.06	91055140	90613788	99.52	14029190	0.31	16453030	0.37	3.87	11595630	59.45	1328	97.7	99.58	99.52	99.46	99.32	99.05	97.8
identifier#34	EDTA_plasma	CYC4	Qiaseq_cfDNA	100	8	11	BioCHICseq3_pool4	187.5	196593356	52.37	174.02	197041088	196032044	99.49	30031506	0.31	34852634	0.36	3.74	26509171	62.12	3045	98.52	99.53	99.49	99.46	99.42	99.39	99.24
identifier#35	EDTA_plasma	EOT	Qiaseq_cfDNA	100	8	11	BioCHICseq3_pool12	187.5	217001700	50.87	218.63	217520304	216445006	99.51	32981861	0.3	37233185	0.35	4.84	22602271	55.5	2626	97.74	99.59	99.52	99.49	99.43	99.37	99
identifier#36	EDTA_plasma	FU3Mo	Qiaseq_cfDNA	60	8	11	BioCHICseq3_pool13	187.5	155960178	50.18	229.53	156268768	155493101	99.5	22999882	0.3	29385689	0.38	5.71	13831280	52.97	1616	95.28	99.72	99.66	99.59	99.45	98.59	95.99
identifier#37	EDTA_plasma	PD	Qiaseq_cfDNA	100	8	11	BioCHICseq3_pool18	187.5	184784280	51.36	182.8	185143352	184271097	99.53	28209208	0.31	31430293	0.35	4.66	20696794	59.04	2405	97.86	99.55	99.49	99.46	99.42	99.34	99.02
identifier#38	STRECK_plasma	CYC2	Qiaseq_cfDNA	78.8755	8	11	BioCHICseq_2_plate2_pool1	187.5	115631190	53.62	168	115663886	115420901	99.79	17517648	0.3	18592495	0.32	3.31	17547678	64.8	2012	99.03	99.82	99.77	99.76	99.73	99.68	99.42
identifier#39	STRECK_plasma	CYC4	Qiaseq_cfDNA	36	8	11	BioCHICseq3_pool4	187.5	103268328	53.22	166.27	103480172	103034679	99.57	15324168	0.3	16244100	0.32	4.21	13146891	62.7	1528	97.96	99.6	99.55	99.52	99.42	99.18	98.32
identifier#40	STRECK_plasma	EOT	Qiaseq_cfDNA	75.1433	8	11	BioCHICseq_2_plate1_pool2	187.5	205740752	53.89	162	205792740	205365275	99.79	32411309	0.31	32791144	0.32	4.2	25962051	60.54	2969	99	99.8	99.76	99.75	99.73	99.69	99.56
identifier#41	STRECK_plasma	CYC2	Qiaseq_cfDNA	51.5659	8	11	BioCHICseq_2_plate2_pool1	187.5	108863096	51.89	213	108889698	108655893	99.79	16654006	0.3	18377931	0.34	3.99	14651226	61.69	1668	98.8	99.9	99.89	99.88	99.84	99.72	99.1
identifier#42	STRECK_plasma	CYC4	Qiaseq_cfDNA	16	8	11	BioCHICseq3_pool4	187.5	64249718	51.78	216.42	64369816	64077809	99.55	9777027	0.3	10914183	0.34	5.41	6343312	57.93	720	97.71	99.45	99.34	99.22	98.92	98.2	96.14
identifier#43	EDTA_plasma	EOT	Qiaseq_cfDNA	16	8	11	BioCHICseq3_pool10	187.5	62778890	51.26	211.38	62885672	62632190	99.6	9406390	0.3	10740535	0.35	5.73	5859855	56.63	671	96.15	99.34	98.94	98.47	97.72	96.66	93.99
identifier#44	STRECK_plasma	CYC2	Qiaseq_cfDNA	100	8	11	BioCHICseq_2_plate2_pool1	187.5	226179394	53.22	167	226226388	225835810	99.83	34389010	0.3	35162886	0.31	3.63	33519163	64.95	3834	99.04	99.79	99.75	99.73	99.71	99.65	99.55
identifier#45	STRECK_plasma	EOT	Qiaseq_cfDNA	10.9629	8	11	BioCHICseq_2_plate1_pool2	187.5	116498984	52.29	167	116544332	116247020	99.74	18379773	0.31	19657167	0.34	7.88	8000604	51.05	919	99.21	99.73	99.68	99.66	99.62	99.48	98.87
identifier#46	EDTA_plasma	CYC2	Qiaseq_cfDNA	54.4496	8	11	BioCHICseq_2_plate2_pool1	187.5	107090260	52.86	180	107122994	106892638	99.78	15306679	0.28	16393468	0.3	3.72	15237864	63.05	1739	98.98	99.79	99.75	99.71	99.64	99.48	99.2
identifier#47	EDTA_plasma	CYC4	Qiaseq_cfDNA	44	8	11	BioCHICseq3_pool4	187.5	93795888	51.72	206.78	94022628	93553825	99.5	13064084	0.28	15425357	0.33	4.02	12165967	61.11	1386	98.25	99.58	99.54	99.5	99.44	99.3	98.42
identifier#48	EDTA_plasma	EOT	Qiaseq_cfDNA	42.8081	8	11	BioCHICseq_2_plate1_pool3	187.5	151167434	52.35	216	151203618	150859846	99.77	22104849	0.29	23944568	0.31	4.7	16907610	56.51	1922	99.28	99.87	99.85	99.84	99.82	99.77	99.51
identifier#49	STRECK_plasma	FU12Mo	Qiaseq_cfDNA	44	8	11	BioCHICseq3_pool10	187.5	84746902	51.76	205.42	84938380	84511453	99.5	11804541	0.28	13635135	0.33	4.79	9336805	58.48	1079	96.4	99.47	99.37	99.28	98.96	97.96	95.9
identifier#50	STRECK_plasma	FU24Mo	Qiaseq_cfDNA	32	8	11	BioCHICseq3_pool13	187.5	164304486	50.94	225.77	164691408	163819910	99.47	22996590	0.28	28747838	0.36	7.61	11246955	50.66	1314	95.58	99.5	99.44	99.37	99.19	98.16	95.57
identifier#51	EDTA_plasma	FU3Mo	Qiaseq_cfDNA	28	8	11	BioCHICseq3_pool13	187.5	145256756	50.54	212.76	145589140	144813222	99.47	20186088	0.28	24853410	0.35	7.26	10571385	52	1228	95.61	99.49	99.4	99.32	99.09	97.99	95.4
identifier#52	EDTA_plasma	FU6Mo	Qiaseq_cfDNA	36	8	11	BioCHICseq3_pool15	187.5	104980042	50.58	220.3	105212282	104707834	99.52	14082148	0.27	16602972	0.32	5.71	9736810	55.77	1136	95.03	99.47	99.37	99.27	98.77	97.29	94.6
identifier#53	EDTA_plasma	CYC2	Qiaseq_cfDNA	45.3729	8	11	BioCHICseq_2_plate2_pool1	187.5	126315700	53.02	168	126356040	126058354	99.76	18486831	0.29	21616780	0.34	4.04	16759677	61.96	1938	98.79	99.61	99.56	99.54	99.52	99.47	99.13
identifier#54	EDTA_plasma	CYC4	Qiaseq_cfDNA	36	8	11	BioCHICseq3_pool4	187.5	96031228	52.58	179.03	96210412	95805910	99.58	13909813	0.29	14668101	0.31	4.19	12099141	61.51	1401	97.94	99.5	99.45	99.41	99.32	99.07	98.12
identifier#55	EDTA_plasma	EOT	Qiaseq_cfDNA	21.9992	8	11	BioCHICseq_2_plate1_pool3	187.5	117437002	52.38	213	117478368	117156938	99.73	17538105	0.3	20216186	0.34	5.87	10852870	54.8	1248	99.28	99.9	99.86	99.82	99.79	99.7	99.29
identifier#56	EDTA_plasma	CYC2	Qiaseq_cfDNA	34.9357	8	11	BioCHICseq_2_plate2_pool2	187.5	103826196	51.95	214	103855346	103618915	99.77	15900050	0.3	17365780	0.33	5.76	10162708	57.41	1163	99.08	99.97	99.95	99.92	99.87	99.69	98.96
identifier#57	EDTA_plasma	CYC4	Qiaseq_cfDNA	36	8	11	BioCHICseq3_pool4	187.5	88937916	52.28	216.81	89110158	88659708	99.49	13605699	0.31	16400690	0.37	4.48	10322673	59.39	1187	97.9	99.55	99.48	99.43	99.31	98.95	97.78
identifier#58	EDTA_plasma	EOT	Qiaseq_cfDNA	12.5796	8	11	BioCHICseq_2_plate1_pool3	187.5	111866498	52.18	231	111915616	111568363	99.69	18045554	0.32	21577713	0.38	8.59	6912582	48.98	781	99.34	99.98	99.95	99.9	99.82	99.54	98.95
identifier#59	EDTA_plasma	CYC2	Qiaseq_cfDNA	52.6891	8	11	BioCHICseq_2_plate2_pool2	187.5	142254926	52.33	219	142301458	141931743	99.74	20631389	0.29	24743117	0.35	4.47	17300595	59.95	1979	99.25	99.99	99.98	99.96	99.93	99.87	99.58
identifier#60	EDTA_plasma	EOT	Qiaseq_cfDNA	70.4064	8	11	BioCHICseq_2_plate1_pool3	187.5	161378306	52.55	223	161423832	161004921	99.74	24081701	0.3	29432294	0.36	4.03	20378451	58.1	2321	99.39	99.99	99.98	99.97	99.95	99.9	99.76
identifier#61	STRECK_plasma	EOT	Qiaseq_cfDNA	23.0288	8	11	ValeriaSEQ_2_cfDNA_pool2	187.5	140458556	51.32	231	140514006	140014457	99.64	24690856	0.35	29213694	0.41	5.07	13680767	52.72	1544	99.28	99.93	99.92	99.9	99.9	99.81	99.42
identifier#62	CSF_fluid	Baseline	Qiaseq_cfDNA	0	8	12	BioCHICseq3_pool1	4.6	119108700	51.08	156.7	120907220	118069321	97.65	21761756	0.37	22383085	0.38	836.99	76280	23.68	8	96.88	32.07	1.77	0.5	0.24	0.06	0.03
identifier#63	STRECK_plasma	CYC2	Qiaseq_cfDNA	78.0005	8	11	BioCHICseq_2_plate2_pool2	187.5	152287030	52.05	232	152333896	151954512	99.75	23168781	0.3	28166267	0.37	3.99	19346932	58.54	2195	99.09	100	99.99	99.98	99.97	99.93	99.64
identifier#64	STRECK_plasma	EOT	Qiaseq_cfDNA	27.978	8	11	ValeriaSEQ_2_cfDNA_pool2	187.5	159082972	51.94	230	159208004	158570840	99.6	29117430	0.36	33336833	0.42	4.62	16611139	53.47	1893	99.13	99.99	99.98	99.98	99.97	99.9	99.53
identifier#65	STRECK_plasma	FU3Mo	Qiaseq_cfDNA	32	8	11	BioCHICseq3_pool14	187.5	146477070	51.81	229.38	146791650	146008105	99.47	21446258	0.29	28369317	0.39	6.52	11679399	53.6	1354	96.35	99.66	99.58	99.51	99.35	98.64	96.48
identifier#66	STRECK_plasma	FU6Mo	Qiaseq_cfDNA	32	8	11	BioCHICseq3_pool15	187.5	109577134	50.9	226	109806844	109263519	99.51	15694643	0.29	19696346	0.36	5.88	9648749	54.87	1133	94.88	99.6	99.46	99.33	98.79	97.18	94.36
identifier#67	STRECK_plasma	FU9Mo	Qiaseq_cfDNA	24	8	11	BioCHICseq3_pool17	187.5	125582034	51.56	198	125828458	125218970	99.52	18497133	0.29	22314931	0.36	7.26	9018301	52.95	1053	95.74	99.53	99.42	99.29	98.79	97.53	95.02
identifier#68	STRECK_plasma	CYC2	Qiaseq_cfDNA	67.3527	8	11	BioCHICseq_2_plate2_pool2	187.5	142740282	51.88	250	142780696	142427585	99.75	20706050	0.29	26481539	0.37	4.09	17765474	57.8	2022	99.02	99.99	99.98	99.96	99.95	99.87	99.5
identifier#69	STRECK_plasma	EOT	Qiaseq_cfDNA	100	8	11	ValeriaSEQ_2_cfDNA_pool3	187.5	371374286	52.04	245	371581402	370201093	99.63	65781399	0.35	78359445	0.42	4.06	44457265	56.39	5067	99.24	100	100	100	100	99.96	99.91
identifier#70	EDTA_plasma	CYC2	Qiaseq_cfDNA	18.6466	8	11	BioCHICseq_2_plate2_pool2	187.5	113228492	53.4	169	113258550	113017908	99.79	16986126	0.3	18183517	0.32	5.41	11748172	59.58	1322	99.03	99.67	99.62	99.6	99.56	99.45	99.08
identifier#71	EDTA_plasma	CYC4	Qiaseq_cfDNA	100	8	11	BioCHICseq3_pool4	187.5	123880200	51.89	224.15	124141504	123524996	99.5	17728695	0.29	19832268	0.32	3.42	17052273	60.7	1933	98.32	99.58	99.52	99.47	99.43	99.33	98.96
identifier#72	EDTA_plasma	EOT	Qiaseq_cfDNA	67.8596	8	11	ValeriaSEQ_2_cfDNA_pool11	214.286	144427070	54.11	170	144485606	144064967	99.71	25537919	0.35	26912891	0.37	3.7	19910536	62.1	2242	99.15	99.72	99.66	99.64	99.61	99.57	99.44
identifier#73	EDTA_plasma	CYC2	Qiaseq_cfDNA	21.2821	8	11	BioCHICseq_2_plate2_pool2	187.5	139676700	53.51	168	139715006	139451432	99.81	21549343	0.31	22184174	0.32	5.64	13847855	58.89	1583	98.94	99.64	99.58	99.55	99.53	99.45	99.1
identifier#74	EDTA_plasma	EOT	Qiaseq_cfDNA	100	8	11	ValeriaSEQ_2_cfDNA_pool11	100.65	297044738	54.47	200	297221390	296129314	99.63	55248829	0.37	60070372	0.4	3.42	41166458	60.5	4589	98.97	99.93	99.9	99.9	99.89	99.86	99.78
identifier#75	EDTA_plasma	CYC2	Qiaseq_cfDNA	29.5522	8	11	BioCHICseq_2_plate2_pool2	187.5	127788750	51.77	174	127823760	127548068	99.78	18786324	0.29	20970176	0.33	4.93	14276412	59.61	1637	98.9	99.78	99.73	99.67	99.62	99.51	99.13
identifier#76	EDTA_plasma	EOT	Qiaseq_cfDNA	35.1894	8	11	ValeriaSEQ_2_cfDNA_pool1	187.5	232311286	53.81	165	232405258	231580182	99.64	43569057	0.37	50168600	0.43	5.04	23719887	56.79	2642	99.05	99.75	99.7	99.66	99.62	99.59	99.44
identifier#77	EDTA_plasma	CYC2	Qiaseq_cfDNA	53.1796	8	11	BioCHICseq_2_plate2_pool2	187.5	166595802	52.92	166	166629340	166362604	99.84	23860657	0.28	23616107	0.28	4.22	21871462	62.85	2492	99.15	99.76	99.72	99.7	99.67	99.62	99.47
identifier#78	EDTA_plasma	CYC4	Qiaseq_cfDNA	40	8	11	BioCHICseq3_pool5	187.5	50558694	52.72	209.72	50669302	50428256	99.52	7153672	0.28	8300084	0.33	3.4	7394798	64.25	840	98.89	99.54	99.48	99.46	99.37	99.2	98.24
identifier#79	EDTA_plasma	EOT	Qiaseq_cfDNA	47.5668	8	11	ValeriaSEQ_2_cfDNA_pool1	187.5	256675404	53.03	197	256834960	255899088	99.64	49592090	0.38	52071201	0.4	5.03	25504008	54.56	2868	99.27	99.98	99.97	99.97	99.96	99.93	99.72
identifier#80	EDTA_plasma	CYC2	Qiaseq_cfDNA	100	8	11	BioCHICseq_2_plate2_pool3	187.5	266875994	53.67	173	266967984	266410269	99.79	40643503	0.3	41916817	0.31	3.68	37970635	63.43	4280	99.18	99.82	99.78	99.75	99.72	99.7	99.63
identifier#81	EDTA_plasma	CYC4	Qiaseq_cfDNA	100	8	11	BioCHICseq3_pool5	187.5	171850986	52.84	173.31	172253262	171276257	99.43	24834584	0.29	31370216	0.37	3.11	25888383	64.84	2946	98.83	99.59	99.55	99.53	99.51	99.46	99.35
identifier#82	EDTA_plasma	EOT	Qiaseq_cfDNA	40.7131	8	11	ValeriaSEQ_2_cfDNA_pool1	187.5	284497536	52.66	220	284624718	283557357	99.62	53603827	0.37	64647155	0.45	5.12	27906877	54.17	3175	99.21	100	99.98	99.97	99.97	99.95	99.77
identifier#83	EDTA_plasma	CYC2	Qiaseq_cfDNA	50.2263	8	11	BioCHICseq_2_plate2_pool3	187.5	132395876	53.23	190	132437058	132142373	99.78	20401777	0.31	21697697	0.33	3.75	18397076	62.08	2070	99.15	99.96	99.94	99.92	99.88	99.79	99.51
identifier#84	EDTA_plasma	CYC4	Qiaseq_cfDNA	100	8	11	BioCHICseq3_pool5	187.5	111306462	52.8	217.65	111543966	110990200	99.5	16644413	0.3	18766238	0.34	3.02	16727008	64.45	1890	98.88	99.59	99.52	99.5	99.47	99.42	99.22
identifier#85	EDTA_plasma	EOT	Qiaseq_cfDNA	21.4494	8	11	ValeriaSEQ_2_cfDNA_pool1	187.5	139468830	52.72	228	139543846	138906321	99.54	27298828	0.39	35122726	0.5	4.96	13889439	54.22	1552	99.12	99.99	99.98	99.97	99.94	99.8	99.34
identifier#86	EDTA_plasma	CYC2	Qiaseq_cfDNA	26.5082	8	11	BioCHICseq_2_plate2_pool3	187.5	100882988	53.87	170	100919008	100695395	99.78	14529240	0.29	16910792	0.33	3.97	14053870	64.3	1608	99	99.77	99.71	99.68	99.64	99.58	99.24
identifier#87	EDTA_plasma	CYC4	Qiaseq_cfDNA	100	8	11	BioCHICseq3_pool5	187.5	208693138	53.67	165.04	209228046	208155505	99.49	30536538	0.29	33121308	0.32	3.31	31831167	66.27	3601	98.8	99.58	99.49	99.48	99.46	99.4	99.3
identifier#88	EDTA_plasma	EOT	Qiaseq_cfDNA	14.2186	8	11	ValeriaSEQ_2_cfDNA_pool1	187.5	113554696	52.72	160	113611972	113191598	99.63	20495073	0.36	23502383	0.41	7.3	8349614	53.73	945	98.89	99.7	99.67	99.63	99.56	99.39	98.36
identifier#89	EDTA_plasma	FU3Mo	Qiaseq_cfDNA	40	8	11	BioCHICseq3_pool14	187.5	102606416	50.79	214.17	102844890	102360566	99.53	15245666	0.3	17543580	0.35	5.92	9228672	56.06	1078	96.19	99.53	99.43	99.35	99.07	98	95.6
identifier#90	EDTA_plasma	FU6Mo	Qiaseq_cfDNA	56	8	11	BioCHICseq3_pool16	187.5	117272738	50.71	232.34	117549006	116928577	99.47	16436767	0.28	20577211	0.36	4.67	12761263	57.03	1486	97.24	99.74	99.66	99.62	99.5	99.26	97.68
identifier#91	EDTA_plasma	CYC2	Qiaseq_cfDNA	29.1021	8	11	BioCHICseq_2_plate2_pool3	187.5	133609282	53.98	162	133651318	133395618	99.81	19813460	0.29	20362478	0.3	4.49	16825434	63.62	1892	99.14	99.72	99.7	99.68	99.65	99.59	99.41
identifier#92	EDTA_plasma	EOT	Qiaseq_cfDNA	41.9606	8	11	ValeriaSEQ_2_cfDNA_pool1	187.5	201850508	53.49	201	201928934	201216299	99.65	36440671	0.36	44749484	0.44	4.28	23678832	57.17	2682	99.09	99.97	99.96	99.96	99.94	99.86	99.63
identifier#93	STRECK_plasma	FU12Mo	Qiaseq_cfDNA	52	8	11	BioCHICseq3_pool11	187.5	136567088	51.32	207.64	136891700	136190065	99.49	19078156	0.28	23298137	0.35	5.95	12357597	55.5	1448	96.24	99.54	99.49	99.45	99.33	98.83	96.64
identifier#94	STRECK_plasma	FU24Mo	Qiaseq_cfDNA	100	8	11	BioCHICseq3_pool13	187.5	163618680	50.91	213.9	163981958	162947541	99.37	22796520	0.28	32746531	0.41	7.62	11667953	52.62	1374	95.48	99.53	99.47	99.38	99.1	98.03	95.57
identifier#95	EDTA_plasma	FU3Mo	Qiaseq_cfDNA	28	8	11	BioCHICseq3_pool14	187.5	135150868	51.25	201.48	135452064	134833266	99.54	18707886	0.28	20531184	0.31	7.09	10505932	55.08	1223	96.53	99.53	99.47	99.41	99.27	98.41	96.3
identifier#96	EDTA_plasma	FU6Mo	Qiaseq_cfDNA	92	8	11	BioCHICseq3_pool16	187.5	126044574	51.25	218.95	126357224	125678394	99.46	17637152	0.28	19959702	0.32	4.68	14205865	58.85	1651	96.58	99.56	99.51	99.47	99.39	99.13	97.32
identifier#97	EDTA_plasma	CYC2	Qiaseq_cfDNA	7.95326	8	11	BioCHICseq_2_plate2_pool3	187.5	78423222	52.89	178	78445490	78275669	99.78	12349497	0.31	13096241	0.33	7.79	5705855	55.61	648	99.21	99.87	99.79	99.75	99.62	99.34	97.8
identifier#98	EDTA_plasma	EOT	Qiaseq_cfDNA	18.622	8	11	ValeriaSEQ_2_cfDNA_pool1	187.5	157788278	52.9	235	157866278	157167390	99.56	30338475	0.38	40545002	0.51	5.7	13847200	52.33	1544	99.15	99.99	99.97	99.97	99.95	99.86	99.36
identifier#99	EDTA_plasma	CYC2	Qiaseq_cfDNA	40	8	11	BioCHICseq3_pool2	187.5	179304594	52.25	170.38	179692166	178775045	99.49	26344871	0.29	32107182	0.36	4.28	21387767	59.82	2416	98.45	99.6	99.53	99.51	99.48	99.39	99.16
identifier#100	EDTA_plasma	CYC2	Qiaseq_cfDNA	27.9249	8	11	BioCHICseq_2_plate2_pool3	187.5	87454188	53.31	170	87481750	87305952	99.8	13440401	0.3	13795034	0.31	3.73	12574711	64.66	1450	99.06	99.75	99.71	99.69	99.66	99.58	99.18
identifier#101	EDTA_plasma	EOT	Qiaseq_cfDNA	100	8	11	ValeriaSEQ_2_cfDNA_pool11	67.518	292822710	54.96	173	292941336	292041575	99.69	56232326	0.38	59628251	0.4	3.21	42746428	62.72	4808	98.95	99.83	99.78	99.76	99.74	99.72	99.67
identifier#102	EDTA_plasma	CYC2	Qiaseq_cfDNA	15.9013	8	11	BioCHICseq_2_plate2_pool4	187.5	113094316	51.42	214	113123150	112902640	99.81	15695766	0.28	16670451	0.29	6.91	8933431	53.31	1010	99.12	99.89	99.88	99.86	99.81	99.56	98.88
identifier#103	EDTA_plasma	EOT	Qiaseq_cfDNA	33.3052	8	11	ValeriaSEQ_2_cfDNA_pool1	187.5	202769298	52.32	243	202841222	202109445	99.64	35408896	0.35	43807169	0.43	5.08	19389728	52.56	2187	99.14	99.95	99.93	99.92	99.91	99.89	99.65
identifier#104	EDTA_plasma	CYC2	Qiaseq_cfDNA	21.9299	8	11	BioCHICseq_2_plate2_pool4	187.5	117964782	51.58	172	117987558	117793079	99.84	16319984	0.27	16519320	0.28	4.83	13275635	58.47	1524	99.1	99.78	99.73	99.72	99.69	99.63	99.22
identifier#105	EDTA_plasma	EOT	Qiaseq_cfDNA	29.6215	8	11	ValeriaSEQ_2_cfDNA_pool2	187.5	166205396	52.82	228	166335702	165623588	99.57	29476013	0.35	34376217	0.41	4.54	17430040	53.19	1985	99.21	99.99	99.97	99.97	99.95	99.92	99.56
identifier#106	EDTA_plasma	CYC2	Qiaseq_cfDNA	24	8	11	BioCHICseq3_pool2	187.5	133948062	52.6	166.94	134215662	133611882	99.55	20094413	0.3	21180047	0.32	4.37	16136550	60.78	1842	98.18	99.52	99.42	99.41	99.38	99.26	98.78
identifier#107	EDTA_plasma	CYC2	Qiaseq_cfDNA	45.6721	8	11	BioCHICseq_2_plate2_pool4	187.5	175173222	53.25	162	175239380	174863725	99.79	27930586	0.32	29317263	0.33	4.34	22135497	61.87	2519	99.01	99.67	99.62	99.59	99.56	99.49	99.3
identifier#108	EDTA_plasma	CYC4	Qiaseq_cfDNA	100	8	11	BioCHICseq3_pool5	68.103	253184160	53.66	164.76	253758884	252556134	99.53	38941337	0.31	39813206	0.32	3.11	40098564	67.43	4554	98.74	99.63	99.52	99.47	99.45	99.4	99.32
identifier#109	EDTA_plasma	EOT	Qiaseq_cfDNA	57.4001	8	11	BioCHICseq_2_plate1_pool3	187.5	192333178	55.58	163	192394160	191951153	99.77	32981369	0.34	34527628	0.36	4.04	24520275	60.09	2702	98.71	99.69	99.65	99.61	99.58	99.54	99.45
identifier#110	EDTA_plasma	CYC2	Qiaseq_cfDNA	7.99457	8	11	BioCHICseq_2_plate2_pool4	187.5	102789308	50.27	173	102828728	102624176	99.8	14953966	0.29	16001257	0.31	11.79	4858261	47.79	559	99.02	99.72	99.67	99.63	99.52	99.08	93.89
identifier#111	EDTA_plasma	EOT	Qiaseq_cfDNA	21.8464	8	11	BioCHICseq_2_plate1_pool3	187.5	145980512	51.95	285	146024948	145447712	99.6	23116895	0.31	34625356	0.47	11.71	6322937	42.21	713	99.65	100	99.99	99.97	99.92	99.84	98.77
identifier#112	EDTA_plasma	CYC2	Qiaseq_cfDNA	48.6365	8	11	BioCHICseq_2_plate2_pool4	187.5	147802462	51.88	172	147831670	147567628	99.82	21647309	0.29	23148845	0.31	4.1	19279788	61.02	2191	99.07	99.76	99.72	99.7	99.67	99.61	99.39
identifier#113	STRECK_plasma	EOT	Qiaseq_cfDNA	33.233	8	11	ValeriaSEQ_2_cfDNA_pool2	187.5	188280448	51.16	172	188378158	187807957	99.7	34054966	0.36	34792310	0.37	4.62	20605779	55.38	2335	98.85	99.77	99.74	99.72	99.68	99.64	99.4
identifier#114	EDTA_plasma	CYC2	Qiaseq_cfDNA	13.7478	8	11	BioCHICseq_2_plate2_pool4	187.5	87024860	51.6	204	87047868	86886476	99.81	12956643	0.3	13694135	0.31	6.31	7641173	55.54	881	99.11	99.92	99.89	99.86	99.8	99.49	98.53
identifier#115	EDTA_plasma	CYC4	Qiaseq_cfDNA	48	8	11	BioCHICseq3_pool5	187.5	54027512	52.48	224.46	54138204	53891658	99.54	7978586	0.3	9184938	0.34	3.33	7835700	63.39	894	98.75	99.57	99.49	99.45	99.36	99.18	98.09
identifier#116	STRECK_plasma	EOT	Qiaseq_cfDNA	16.0086	8	11	ValeriaSEQ_2_cfDNA_pool2	187.5	140646534	51.18	171	140752834	140232871	99.63	25101042	0.35	27639485	0.39	5.49	13185131	53.84	1532	98.85	99.71	99.66	99.63	99.59	99.49	99.06
identifier#117	EDTA_plasma	CYC2	Qiaseq_cfDNA	24.1317	8	11	BioCHICseq_2_plate2_pool4	187.5	112045730	52.23	171	112071366	111869480	99.82	17004149	0.3	17570678	0.31	5.28	11736046	58.26	1343	99.05	99.65	99.58	99.56	99.52	99.45	99.08
identifier#118	EDTA_plasma	EOT	Qiaseq_cfDNA	32.7986	8	11	BioCHICseq_2_plate1_pool4	187.5	165085742	52.93	203	165132768	164678244	99.72	26007657	0.31	30735338	0.37	5.07	17676775	57.56	2003	99.31	99.91	99.88	99.87	99.85	99.8	99.55
identifier#119	EDTA_plasma	CYC2	Qiaseq_cfDNA	16.3832	8	11	BioCHICseq_2_plate2_pool4	187.5	116517832	51.33	224	116556710	116235890	99.72	17603381	0.3	21529538	0.37	7.32	8530916	51.22	979	99.21	99.93	99.93	99.93	99.91	99.68	98.82
identifier#120	STRECK_plasma	CYC4	Qiaseq_cfDNA	92	8	11	BioCHICseq3_pool5	187.5	122417944	53.07	213.89	122668850	122086647	99.53	17926495	0.29	19950569	0.33	3.46	17352755	62.35	1969	98.6	99.63	99.57	99.53	99.49	99.42	99.14
identifier#121	EDTA_plasma	EOT	Qiaseq_cfDNA	26.8566	8	11	BioCHICseq_2_plate1_pool4	187.5	168301546	53.67	223	168374332	167892923	99.71	27336840	0.32	30325098	0.36	7.86	11494696	51.15	1285	99.39	99.93	99.93	99.93	99.93	99.86	99.45
identifier#122	STRECK_plasma	CYC2	Qiaseq_cfDNA	39.4621	8	11	BioCHICseq_2_plate2_pool5	187.5	121991100	53.05	171	122029608	121765478	99.78	19168672	0.31	20020364	0.33	4.01	16479586	63.06	1880	99.02	99.66	99.62	99.57	99.54	99.48	99.25
identifier#123	STRECK_plasma	CYC4	Qiaseq_cfDNA	92	8	11	BioCHICseq3_pool5	187.5	74211174	53.01	213.46	74416658	73947251	99.37	11470074	0.31	13938398	0.38	3.16	11043674	64.05	1253	98.67	99.45	99.39	99.37	99.33	99.24	98.7
identifier#124	EDTA_plasma	EOT	Qiaseq_cfDNA	24.1946	8	11	BioCHICseq_2_plate1_pool4	187.5	112421482	52.95	227	112454938	112165313	99.74	19000684	0.33	21099552	0.37	8.8	6855455	49.82	772	99.3	99.91	99.89	99.85	99.78	99.54	98.64
identifier#125	STRECK_plasma	FU12Mo	Qiaseq_cfDNA	12	8	11	BioCHICseq3_pool11	187.5	147789786	50.9	166.68	148179748	147489979	99.53	22739749	0.31	23212299	0.32	17.08	4747956	42.49	548	95.98	99.26	98.94	98.42	97.49	96.07	90.84
identifier#126	STRECK_plasma	CYC2	Qiaseq_cfDNA	21.3932	8	11	BioCHICseq_2_plate2_pool5	187.5	93949076	52.57	169	93968646	93808777	99.83	14294531	0.3	14296853	0.3	4.47	11765889	62.36	1349	98.91	99.52	99.45	99.43	99.39	99.3	98.95
identifier#127	EDTA_plasma	EOT	Qiaseq_cfDNA	46.2673	8	11	BioCHICseq_2_plate1_pool4	187.5	162215566	52.57	212	162256302	161807286	99.72	25311759	0.31	29237146	0.36	5.36	16474030	56.68	1878	99.14	99.83	99.82	99.81	99.78	99.7	99.38
identifier#128	STRECK_plasma	FU12Mo	Qiaseq_cfDNA	8	8	11	BioCHICseq3_pool11	187.5	134723536	50.94	168.55	135027414	134373020	99.52	19577972	0.29	21841807	0.33	8.85	8028466	49.26	941	95.38	99.34	99.2	98.95	98.28	96.91	94.24
identifier#129	CSF_fluid	Baseline	Qiaseq_cfDNA	0	8	12	BioCHICseq3_pool1	7.567	185564916	50.55	175.79	187464104	184260556	98.29	31523355	0.34	39444900	0.43	867.38	113906	23.83	12	98.15	66.55	8.7	1.01	0.21	0.06	0.05
identifier#130	CSF_fluid	CYC2	Qiaseq_cfDNA	0	8	12	BioCHICseq3_pool1	4.462	137699514	51.52	171.87	139295928	136585112	98.05	24805903	0.36	27773204	0.41	853.6	86483	22.81	9	97.83	41.52	2.71	0.58	0.17	0.06	0.05
identifier#131	EDTA_plasma	CYC2	Qiaseq_cfDNA	100	8	11	BioCHICseq_2_plate2_pool5	187.5	386882456	52.94	172	386994736	386188286	99.79	56754516	0.29	60727511	0.31	4.3	50297804	62.88	5672	99.08	99.81	99.79	99.76	99.72	99.63	99.49
identifier#132	STRECK_plasma	CYC4	Qiaseq_cfDNA	100	8	11	BioCHICseq3_pool6	187.5	128630822	53.04	167.99	128879408	128324504	99.57	18457248	0.29	19638830	0.31	3.24	19606416	65.58	2225	98.68	99.45	99.39	99.36	99.33	99.28	99.09
identifier#133	CSF_fluid	EOT	Qiaseq_cfDNA	0	8	12	BioCHICseq3_pool1	5.382	173854750	49.93	286.87	175384990	172603517	98.41	29130974	0.34	42272916	0.5	904.66	97061	21.62	9	96.63	48.26	4.93	1.28	0.49	0.1	0.03
identifier#134	EDTA_plasma	EOT	Qiaseq_cfDNA	30.6413	8	11	BioCHICseq_2_plate1_pool4	187.5	129829328	53.93	206	129880570	129475384	99.69	21191831	0.32	24652461	0.38	7.18	9824261	52.86	1089	99.33	99.91	99.89	99.88	99.83	99.68	99.3
identifier#135	STRECK_plasma	FU3Mo	Qiaseq_cfDNA	28	8	11	BioCHICseq3_pool14	187.5	125585334	51.99	184.07	125875254	125235567	99.49	18304022	0.29	19689867	0.32	6.48	10277618	55.24	1198	96.43	99.42	99.34	99.29	99.12	98.28	96.17
identifier#136	EDTA_plasma	CYC2	Qiaseq_cfDNA	36.2469	8	11	BioCHICseq_2_plate2_pool5	187.5	123233994	53.56	173	123271934	123022155	99.8	19402948	0.31	19955025	0.32	3.87	16805589	62.44	1886	99.41	99.85	99.8	99.76	99.72	99.68	99.57
identifier#137	STRECK_plasma	CYC4	Qiaseq_cfDNA	100	8	11	BioCHICseq3_pool6	187.5	111141764	53.01	226.13	111369040	110843650	99.53	16873917	0.3	18880257	0.34	3.24	15989337	62.82	1802	98.54	99.59	99.55	99.51	99.48	99.4	99.06
identifier#138	EDTA_plasma	EOT	Qiaseq_cfDNA	17.0486	8	11	BioCHICseq_2_plate1_pool4	187.5	113503626	51.67	245	113539626	113167746	99.67	18308283	0.32	24058080	0.42	10.63	5548979	45.93	618	99.52	100	100	100	99.94	99.61	98.27
identifier#139	STRECK_plasma	FU12Mo	Qiaseq_cfDNA	60	8	11	BioCHICseq3_pool11	187.5	96771974	50.64	231.05	96992038	96521479	99.51	14528437	0.3	16263961	0.34	10.83	4526544	45.32	519	95.72	99.43	99.03	98.48	97.57	95.67	91.13
identifier#140	STRECK_plasma	FU24Mo	Qiaseq_cfDNA	100	8	11	BioCHICseq3_pool13	107.66	64075584	50.14	230.21	64210180	63873187	99.48	9416400	0.29	12283087	0.39	19.16	1725212	38.53	196	95.85	98.75	97.4	96.45	94.99	90.82	8.8
identifier#141	STRECK_plasma	FU3Mo	Qiaseq_cfDNA	100	8	11	BioCHICseq3_pool14	187.5	100615594	50.65	222.38	100842686	100312409	99.47	15272731	0.3	18390885	0.37	13.16	3878208	44.89	441	96.45	99.4	99.03	98.54	97.64	95.97	90.1
identifier#142	STRECK_plasma	CYC2	Qiaseq_cfDNA	85.849	8	11	BioCHICseq_2_plate2_pool5	187.5	100809684	51.89	248	100842836	100577814	99.74	14569307	0.29	17961703	0.35	5.9	9327970	55.13	1061	99.23	99.94	99.91	99.89	99.85	99.7	99.1
identifier#143	EDTA_plasma	EOT	Qiaseq_cfDNA	42.4454	8	11	BioCHICseq_2_plate1_pool5	187.5	133498136	52.29	242	133536002	133155318	99.71	20137851	0.3	23955096	0.36	4.84	14054254	54.65	1589	99.27	99.93	99.92	99.9	99.88	99.8	99.44
identifier#144	STRECK_plasma	CYC2	Qiaseq_cfDNA	100	8	11	BioCHICseq_2_plate2_pool5	187.5	174909880	53.18	165	174963236	174608645	99.8	26336775	0.3	27260782	0.31	3.84	24497172	63.64	2787	98.99	99.63	99.56	99.54	99.52	99.47	99.32
identifier#145	STRECK_plasma	CYC4	Qiaseq_cfDNA	100	8	11	BioCHICseq3_pool6	128.938	279187816	53.39	171.02	279696618	278478164	99.56	40416025	0.29	48047686	0.35	3.24	42783705	66.1	4872	98.7	99.58	99.48	99.42	99.38	99.34	99.28
identifier#146	EDTA_plasma	EOT	Qiaseq_cfDNA	34.7638	8	11	BioCHICseq_2_plate1_pool5	187.5	141597396	53.2	223	141667178	141228542	99.69	22970673	0.32	26444708	0.37	5.12	14387357	54.91	1616	99.32	99.91	99.9	99.9	99.86	99.75	99.45
identifier#147	STRECK_plasma	FU3Mo	Qiaseq_cfDNA	100	8	11	BioCHICseq3_pool14	187.5	124962774	51.1	221.58	125251892	124625636	99.5	18024926	0.29	21723530	0.35	4.17	14787385	57.3	1652	96.94	99.74	99.69	99.66	99.54	99.34	97.96
identifier#148	STRECK_plasma	FU6Mo	Qiaseq_cfDNA	44	8	11	BioCHICseq3_pool16	187.5	108732796	51.89	212.36	108947524	108379172	99.48	15971221	0.29	19372280	0.36	5.52	10235838	55.68	1190	95.92	99.51	99.37	99.29	99.09	98.05	95.64
identifier#149	STRECK_plasma	PD	Qiaseq_cfDNA	100	8	11	BioCHICseq3_pool18	187.5	129357192	50.66	205.17	129594020	128783100	99.37	18701339	0.29	22400272	0.35	4.9	12596815	53.48	1403	98.09	99.84	99.8	99.73	99.61	99.34	98.35
identifier#150	STRECK_plasma	CYC2	Qiaseq_cfDNA	32	8	11	BioCHICseq3_pool2	187.5	173047658	52.27	221.01	173410718	172508811	99.48	25591187	0.3	31351353	0.37	5.96	15346220	56.27	1781	98.15	99.57	99.49	99.46	99.42	99.27	98.7
identifier#151	STRECK_plasma	CYC2	Qiaseq_cfDNA	100	8	11	BioCHICseq_2_plate2_pool6	187.5	182698942	52.48	220	182740690	182323608	99.77	28384810	0.31	32555819	0.35	4.51	21537196	58.31	2458	99.14	99.99	99.99	99.98	99.96	99.89	99.69
identifier#152	STRECK_plasma	CYC4	Qiaseq_cfDNA	100	8	11	BioCHICseq3_pool6	187.5	135556722	53.05	175.45	135842708	135212479	99.54	20545520	0.3	22117413	0.33	3.19	20336890	64.76	2320	98.62	99.57	99.51	99.49	99.45	99.4	99.16
identifier#153	STRECK_plasma	EOT	Qiaseq_cfDNA	100	8	11	ValeriaSEQ_2_cfDNA_pool3	187.5	107764766	51.68	249	107838498	107367625	99.56	20224315	0.37	24903630	0.46	4.58	11615545	55.17	1328	98.79	100	99.98	99.97	99.94	99.77	98.91
identifier#154	STRECK_plasma	FU12Mo	Qiaseq_cfDNA	100	8	11	BioCHICseq3_pool11	187.5	225534950	51.73	220.27	226068566	224898928	99.48	34221016	0.3	42090089	0.38	4.34	25238667	56.17	2879	97.9	99.66	99.56	99.52	99.48	99.43	99.17
identifier#155	STRECK_plasma	FU24Mo	Qiaseq_cfDNA	100	8	11	BioCHICseq3_pool13	187.5	153997672	50.9	227.75	154350660	153556722	99.49	23376414	0.3	26535090	0.35	7.96	10002535	50.32	1170	95.88	99.56	99.47	99.38	99.21	98.2	95.44
identifier#156	STRECK_plasma	FU3Mo	Qiaseq_cfDNA	100	8	11	BioCHICseq3_pool14	187.5	174221718	51.85	240.26	174621090	173620259	99.43	26691847	0.31	34239757	0.4	3.93	20567517	56.85	2343	97.54	99.68	99.6	99.57	99.52	99.43	98.94
identifier#157	STRECK_plasma	FU6Mo	Qiaseq_cfDNA	100	8	11	BioCHICseq3_pool16	187.5	235492234	52.2	232.51	236014488	234691469	99.44	36044849	0.31	43827517	0.38	3.62	30244534	58.62	3435	98.39	99.66	99.57	99.54	99.5	99.45	99.36
identifier#158	STRECK_plasma	CYC2	Qiaseq_cfDNA	100	8	11	BioCHICseq_2_plate2_pool6	187.5	107760914	52.25	169	107787034	107581240	99.81	15853409	0.29	16479419	0.3	6.15	9897960	57.05	1122	99.17	99.79	99.72	99.69	99.65	99.55	99.07
identifier#159	STRECK_plasma	EOT	Qiaseq_cfDNA	96.8154	8	11	ValeriaSEQ_2_cfDNA_pool3	187.5	183416268	53.01	159	183481662	182994926	99.73	31976598	0.35	32273695	0.35	3.94	24333548	61.66	2746	98.72	99.73	99.7	99.69	99.67	99.62	99.44
identifier#160	STRECK_plasma	FU12Mo	Qiaseq_cfDNA	100	8	11	BioCHICseq3_pool11	187.5	122511528	50.5	201.43	122753824	122245030	99.59	17329170	0.28	18409841	0.3	5.44	11689361	54.92	1359	95.55	99.56	99.5	99.43	99.26	98.46	95.7
identifier#161	STRECK_plasma	FU3Mo	Qiaseq_cfDNA	72	8	11	BioCHICseq3_pool18	187.5	136334194	51.05	220.12	136580110	135861434	99.47	19691610	0.29	24626289	0.37	6.79	10199859	54.28	1174	97.23	99.53	99.45	99.42	99.27	98.65	96.97
identifier#162	STRECK_plasma	FU6Mo	Qiaseq_cfDNA	100	8	11	BioCHICseq3_pool16	187.5	175923338	51.42	237.59	176245534	175421785	99.53	24916520	0.28	30070535	0.35	4.11	20733457	57.05	2366	96.91	99.65	99.6	99.56	99.53	99.4	98.56
identifier#163	STRECK_plasma	FU9Mo	Qiaseq_cfDNA	80	8	11	BioCHICseq3_pool17	187.5	133722690	50.75	236.98	133965372	133307032	99.51	19112773	0.29	23067007	0.35	4.98	13459222	54.82	1551	95.65	99.62	99.57	99.52	99.36	98.74	96.4
identifier#164	STRECK_plasma	PD	Qiaseq_cfDNA	24	8	11	BioCHICseq3_pool18	161.34	63936296	50.83	212.25	64054290	63730097	99.49	9282959	0.29	10804257	0.34	10.32	3108074	48.21	353	97.29	99.35	99.02	98.61	97.89	96.19	84.43
identifier#165	STRECK_plasma	CYC2	Qiaseq_cfDNA	41.009	8	11	BioCHICseq_2_plate2_pool6	187.5	136979296	52.67	220	137024186	136703907	99.77	20548787	0.3	22517689	0.33	5.84	12993052	56.33	1480	99.34	99.98	99.97	99.96	99.92	99.84	99.45
identifier#166	STRECK_plasma	EOT	Qiaseq_cfDNA	28.234	8	11	BioCHICseq_2_plate1_pool5	187.5	143376028	53.58	176	143418394	143037646	99.73	22363954	0.31	24317263	0.34	5.26	14417451	55.81	1669	99.08	99.94	99.91	99.89	99.81	99.68	99.36
identifier#167	STRECK_plasma	CYC2	Qiaseq_cfDNA	49.1435	8	11	BioCHICseq_2_plate2_pool6	187.5	155435438	52.52	226	155474264	155173415	99.81	21518602	0.27	23372640	0.3	5.38	16078730	57.64	1858	99.16	99.93	99.92	99.9	99.88	99.84	99.4
identifier#168	STRECK_plasma	CYC4	Qiaseq_cfDNA	100	8	11	BioCHICseq3_pool6	187.5	186262682	53.75	176.11	186633224	185748436	99.53	25112197	0.27	29534941	0.32	3.19	27685377	64.42	3192	98.45	99.5	99.45	99.4	99.37	99.33	99.18
identifier#169	STRECK_plasma	EOT	Qiaseq_cfDNA	37.2927	8	11	BioCHICseq_2_plate1_pool5	187.5	150370092	53.44	224	150444272	149930145	99.66	22156411	0.29	26292252	0.35	5.33	14640938	54.33	1724	98.92	99.93	99.92	99.9	99.88	99.85	99.34
identifier#170	STRECK_plasma	CYC2	Qiaseq_cfDNA	29.7409	8	11	BioCHICseq_2_plate2_pool6	187.5	119312938	51.36	289	119341912	119029161	99.74	18686204	0.31	23460959	0.39	10.13	6119615	45.49	688	99.5	100	100	99.99	99.94	99.75	98.36
identifier#171	STRECK_plasma	EOT	Qiaseq_cfDNA	28.4977	8	11	BioCHICseq_2_plate1_pool5	187.5	111698606	51.45	299	111731428	111319163	99.63	18436741	0.33	25908455	0.46	7.41	7281377	45.22	823	99.59	100	100	99.99	99.97	99.88	98.93
identifier#172	STRECK_plasma	CYC2	Qiaseq_cfDNA	75.3241	8	11	BioCHICseq_2_plate2_pool6	187.5	161457894	52.65	222	161488712	161172681	99.8	24923435	0.31	26465792	0.33	4.08	20608610	59.38	2339	99.21	99.93	99.93	99.93	99.93	99.92	99.65
identifier#173	STRECK_plasma	CYC4	Qiaseq_cfDNA	100	8	11	BioCHICseq3_pool6	187.5	254194706	53.8	162.61	254856298	253585113	99.5	38750894	0.31	39158616	0.31	3.51	37776536	66.09	4352	98.56	99.51	99.42	99.4	99.36	99.3	99.23
identifier#174	STRECK_plasma	EOT	Qiaseq_cfDNA	100	8	11	BioCHICseq_2_plate1_pool5	187.5	266738094	53.42	175	266828302	266112215	99.73	42999733	0.32	46083622	0.34	4.13	32482879	57.97	3762	99.07	99.87	99.84	99.82	99.78	99.72	99.6
identifier#175	STRECK_plasma	CYC2	Qiaseq_cfDNA	100	8	11	BioCHICseq_2_plate2_pool6	187.5	142601498	52.97	198	142637992	142312453	99.77	21738696	0.3	24011225	0.33	4.05	18520383	60.05	2112	99.12	99.97	99.96	99.94	99.91	99.83	99.55
identifier#176	STRECK_plasma	EOT	Qiaseq_cfDNA	21.2334	8	11	BioCHICseq_2_plate1_pool5	187.5	130138870	53.01	238	130189150	129820279	99.72	20864693	0.32	23606508	0.36	6.52	10288224	51.14	1196	99.2	99.99	99.98	99.97	99.93	99.76	99.13
identifier#177	CSF_fluid	Baseline	Qiaseq_cfDNA	0	8	12	BioCHICseq3_pool1	6.808	172700442	50.75	166.71	174655446	171356172	98.11	31959225	0.37	37045145	0.44	918.71	98170	22.46	10	97.42	53.09	4.28	0.78	0.27	0.03	0.03
identifier#178	STRECK_plasma	CYC2	Qiaseq_cfDNA	32.109	8	11	BioCHICseq_2_plate2_pool6	187.5	128433672	51.93	232	128475962	128204897	99.79	19743665	0.3	21987659	0.34	6.04	11449118	54.43	1299	99.37	99.99	99.98	99.97	99.96	99.86	99.39
identifier#179	STRECK_plasma	EOT	Qiaseq_cfDNA	99.491	8	11	BioCHICseq_2_plate1_pool5	187.5	121126762	51.83	235	121161208	120844125	99.74	19258113	0.32	22909217	0.38	8.32	7599052	47.91	860	99.52	99.99	99.98	99.97	99.92	99.72	99.15
identifier#180	EDTA_plasma	CYC2	Qiaseq_cfDNA	28.9661	8	11	BioCHICseq_2_plate2_pool7	187.5	137958890	52.24	231	137996766	137693897	99.78	19906293	0.29	23008108	0.33	6.09	12421194	55.33	1415	99.34	99.92	99.91	99.9	99.89	99.82	99.4
identifier#181	EDTA_plasma	CYC4	Qiaseq_cfDNA	48	8	11	BioCHICseq3_pool6	187.5	51783114	52.39	214.78	51875028	51639050	99.55	7175039	0.28	8319773	0.33	3.35	7506927	63.47	856	98.03	99.48	99.39	99.31	99.17	98.75	97.15
identifier#182	EDTA_plasma	EOT	Qiaseq_cfDNA	100	8	11	BioCHICseq_2_plate1_pool6	132.42	235020440	56.42	165	235078590	234498135	99.75	37072672	0.31	38743007	0.33	3.32	34991276	64.9	3801	98.31	99.67	99.65	99.64	99.62	99.59	99.53
identifier#183	EDTA_plasma	FU12Mo	Qiaseq_cfDNA	36	8	11	BioCHICseq3_pool12	187.5	90166736	50.91	204.01	90363402	89914550	99.5	12804761	0.28	15000347	0.34	6.59	7129777	52.5	819	96.91	99.46	99.37	99.29	99.04	98	95.42
identifier#184	EDTA_plasma	FU3Mo	Qiaseq_cfDNA	100	8	11	BioCHICseq3_pool14	187.5	182841226	52.44	165.53	183217706	182399385	99.55	26393283	0.29	26753801	0.3	3.77	24900395	62.55	2831	98.27	99.49	99.43	99.41	99.38	99.33	99.18
identifier#185	EDTA_plasma	FU6Mo	Qiaseq_cfDNA	100	8	11	BioCHICseq3_pool16	187.5	203093902	52.67	164.14	203487558	202543245	99.54	29473212	0.29	30616815	0.31	3.73	27702363	62.43	3152	98.53	99.49	99.44	99.41	99.38	99.34	99.23
identifier#186	EDTA_plasma	FU9Mo	Qiaseq_cfDNA	20	8	11	BioCHICseq3_pool17	187.5	113845232	50.67	170.86	114055998	113561354	99.57	15977968	0.28	17272302	0.31	10.99	5588037	48.32	640	95.97	99.38	99.2	98.82	98.01	96.41	93.36
identifier#187	EDTA_plasma	PD	Qiaseq_cfDNA	28	8	11	BioCHICseq3_pool18	187.5	111235562	50.85	227.04	111435628	110851604	99.48	15810450	0.28	20151140	0.37	7.28	7593762	52.12	871	97.35	99.5	99.41	99.34	99.08	98.28	96.25
identifier#188	EDTA_plasma	CYC2	Qiaseq_cfDNA	26.9598	8	11	BioCHICseq_2_plate2_pool7	187.5	138409988	53.9	223	138444144	138122141	99.77	22847507	0.33	24899813	0.36	6.25	12308687	55.65	1364	99.37	99.99	99.98	99.98	99.95	99.87	99.44
identifier#189	EDTA_plasma	CYC4	Qiaseq_cfDNA	100	8	11	BioCHICseq3_pool6	187.5	74315164	53	173.02	74488576	74119616	99.5	11109547	0.3	11903461	0.32	2.92	11493703	66	1289	98.72	99.52	99.48	99.46	99.42	99.29	98.79
identifier#190	EDTA_plasma	EOT	Qiaseq_cfDNA	45.0709	8	11	BioCHICseq_2_plate1_pool6	187.5	83811252	53.48	184	83829218	83618650	99.75	12988453	0.31	14542440	0.34	3.41	12326421	63.32	1385	99.28	99.96	99.95	99.91	99.83	99.7	99.38
identifier#191	EDTA_plasma	CYC2	Qiaseq_cfDNA	44.7072	8	11	BioCHICseq_2_plate2_pool7	187.5	113941894	52.58	219	113973366	113730854	99.79	17367888	0.3	18516195	0.32	4.4	14124028	60.05	1592	99.39	100	99.99	99.98	99.96	99.92	99.52
identifier#192	EDTA_plasma	EOT	Qiaseq_cfDNA	100	8	11	BioCHICseq_2_plate1_pool6	187.5	210427292	53.44	171	210487334	209942216	99.74	31817839	0.3	37090294	0.35	3.43	31174538	64.13	3511	99.24	99.8	99.76	99.74	99.73	99.69	99.63
identifier#193	EDTA_plasma	CYC2	Qiaseq_cfDNA	42.3872	8	11	BioCHICseq_2_plate2_pool7	187.5	125482508	53.69	211	125522798	125216354	99.76	19887615	0.31	21960933	0.35	4.62	14757435	59.48	1685	99.27	99.92	99.91	99.9	99.88	99.84	99.5
identifier#194	EDTA_plasma	CYC4	Qiaseq_cfDNA	92	8	11	BioCHICseq3_pool7	187.5	102615278	52.17	222.04	102855488	102300059	99.46	15389434	0.3	18059262	0.36	3.21	15016848	63.15	1714	98.68	99.7	99.65	99.62	99.58	99.51	99.1
identifier#195	EDTA_plasma	EOT	Qiaseq_cfDNA	28.5754	8	11	BioCHICseq_2_plate1_pool6	187.5	78101212	53.54	221	78126756	77892215	99.7	12223252	0.31	14479636	0.37	3.97	10274647	61.22	1176	99.33	99.93	99.91	99.9	99.87	99.74	99.29
identifier#196	EDTA_plasma	CYC2	Qiaseq_cfDNA	23.8249	8	11	BioCHICseq_2_plate2_pool7	187.5	120929108	52.43	182	120962340	120703549	99.79	18366571	0.3	19854300	0.33	6.27	10809654	56.88	1239	99.31	99.99	99.98	99.95	99.91	99.77	99.28
identifier#197	EDTA_plasma	CYC4	Qiaseq_cfDNA	100	8	11	BioCHICseq3_pool7	187.5	280157086	53	164.79	280859722	279337737	99.46	42215415	0.3	45183941	0.33	3.53	41110543	65.46	4696	98.95	99.61	99.52	99.5	99.48	99.44	99.39
identifier#198	EDTA_plasma	EOT	Qiaseq_cfDNA	9.62779	8	11	BioCHICseq_2_plate1_pool6	187.5	50630852	53.37	168	50645774	50523832	99.76	7889054	0.31	8353426	0.33	4.67	5942467	61.22	683	99.25	99.76	99.74	99.71	99.67	99.5	97.15
identifier#199	EDTA_plasma	FU1Mo	Qiaseq_cfDNA	24	8	11	BioCHICseq3_pool12	187.5	122011406	51.61	217.07	122318208	121706243	99.5	18359057	0.3	20383301	0.34	6.34	9967262	52.86	1159	96.72	99.54	99.45	99.39	99.15	98.36	96.41
identifier#200	EDTA_plasma	FU3Mo	Qiaseq_cfDNA	16	8	11	BioCHICseq3_pool15	187.5	127447700	51.19	203.83	127704884	127098575	99.53	18335901	0.29	21709364	0.35	11.92	5752381	48.21	671	96.17	99.46	99.38	99.25	98.63	96.94	93.01
identifier#201	EDTA_plasma	FU6Mo	Qiaseq_cfDNA	52	8	11	BioCHICseq3_pool16	187.5	115785946	51.4	219.61	116035558	115426970	99.48	16640677	0.29	19792458	0.35	4.66	12685205	57.61	1466	96.59	99.54	99.49	99.42	99.32	98.97	96.92
identifier#202	EDTA_plasma	CYC4	Qiaseq_cfDNA	88	8	11	BioCHICseq3_pool7	187.5	72852760	52.17	232.27	73032004	72638904	99.46	10195315	0.28	12481403	0.35	3.14	10662817	62.79	1206	98.34	99.54	99.47	99.44	99.39	99.21	98.27
identifier#203	STRECK_plasma	CYC2	Qiaseq_cfDNA	100	8	11	BioCHICseq_2_plate2_pool7	187.5	284387758	53.44	162	284465558	283908336	99.8	44864054	0.31	45251288	0.32	3.99	39376480	63.99	4488	99.16	99.79	99.75	99.74	99.72	99.68	99.59
identifier#204	STRECK_plasma	CYC4	Qiaseq_cfDNA	100	8	11	BioCHICseq3_pool7	187.5	269783336	52.79	164.72	270457830	269122943	99.51	41157315	0.31	41563121	0.31	3.72	37963318	64.22	4314	98.68	99.62	99.54	99.51	99.49	99.43	99.32
identifier#205	STRECK_plasma	EOT	Qiaseq_cfDNA	100	8	11	BioCHICseq_2_plate1_pool6	79.96	319160274	54.7	166	319247330	318433106	99.74	52423096	0.33	55162976	0.34	3.46	46562889	63.68	5286	98.94	99.82	99.78	99.76	99.75	99.73	99.68
identifier#206	STRECK_plasma	EOT	Qiaseq_cfDNA	5.71141	8	11	BioCHICseq_2_plate1_pool6	187.5	60596200	53.1	167	60616452	60471528	99.76	8827757	0.29	9404354	0.31	7.73	4428487	55.67	515	99.04	99.62	99.57	99.53	99.44	99.04	92.02
identifier#207	STRECK_plasma	CYC4	Qiaseq_cfDNA	100	8	11	BioCHICseq3_pool7	187.5	168426024	52.84	185.07	168816716	167975226	99.5	24447821	0.29	28539093	0.34	3.29	24164081	62.23	2710	98.49	99.64	99.53	99.49	99.44	99.4	99.26
identifier#208	CSF_fluid	Baseline	Qiaseq_cfDNA	0	8	12	BioCHICseq3_pool1	2.645	51855404	50.81	262.37	53969746	50600426	93.76	13348237	0.53	15497854	0.62	906.07	23552	11.2	2	83.48	1.06	0.24	0.14	0.05	0.01	0.03
identifier#209	EDTA_plasma	CYC2	Qiaseq_cfDNA	36.6021	8	11	BioCHICseq_2_plate2_pool7	187.5	120831768	51.98	228	120869880	120557964	99.74	17847831	0.29	21945236	0.36	5.9	11362074	56.34	1303	99.31	100	99.98	99.95	99.93	99.85	99.32
identifier#210	EDTA_plasma	CYC4	Qiaseq_cfDNA	100	8	11	BioCHICseq3_pool7	187.5	116105836	52.53	220.19	116388182	115762212	99.46	16988696	0.29	19420009	0.34	3.09	17286688	63.49	1968	98.49	99.55	99.46	99.41	99.38	99.31	98.98
identifier#211	EDTA_plasma	EOT	Qiaseq_cfDNA	100	8	11	BioCHICseq_2_plate1_pool6	187.5	134413790	53.62	164	134459302	134169881	99.78	20119806	0.3	20991761	0.31	3.19	20939526	66.05	2393	99.12	99.72	99.7	99.69	99.67	99.64	99.51
identifier#212	STRECK_plasma	FU12Mo	Qiaseq_cfDNA	20	8	11	BioCHICseq3_pool12	187.5	106126928	51.14	217.71	106383352	105862099	99.51	15623055	0.29	17175348	0.33	7.28	7702560	51.24	900	96.54	99.48	99.3	99.19	98.79	97.69	95.32
identifier#213	STRECK_plasma	FU18Mo	Qiaseq_cfDNA	28	8	11	BioCHICseq3_pool12	187.5	113559796	51.2	223.98	113819862	113298163	99.54	16574159	0.29	18328490	0.33	6.69	8899520	52.08	1039	96.71	99.56	99.47	99.34	99.07	98.13	96
identifier#214	STRECK_plasma	FU24Mo	Qiaseq_cfDNA	24	8	11	BioCHICseq3_pool13	187.5	151346048	50.87	217.46	151651096	150915602	99.52	21581514	0.29	27073745	0.36	10.08	7980203	48.14	942	95.43	99.46	99.33	99.14	98.42	96.87	94.16
identifier#215	EDTA_plasma	FU6Mo	Qiaseq_cfDNA	32	8	11	BioCHICseq3_pool17	187.5	155918356	50.63	222.96	156246488	155483624	99.51	22253139	0.29	26309388	0.34	8.11	10214209	51.35	1196	96.33	99.5	99.41	99.35	99.21	98.5	95.9
identifier#216	STRECK_plasma	FU9Mo	Qiaseq_cfDNA	24	8	11	BioCHICseq3_pool18	187.5	130652752	50.64	245.95	130902682	130288859	99.53	19019656	0.29	26409118	0.41	10.86	6048743	46.08	693	97.52	99.8	99.66	99.55	99.18	98.15	95.16
identifier#217	EDTA_plasma	CYC2	Qiaseq_cfDNA	63.019	8	11	BioCHICseq_2_plate2_pool7	187.5	154053624	52.46	222	154123798	153740247	99.75	22320840	0.29	25514874	0.33	4.53	18332568	59.21	2081	99.22	99.92	99.9	99.89	99.88	99.8	99.49
identifier#218	EDTA_plasma	EOT	Qiaseq_cfDNA	87.6241	8	11	BioCHICseq_2_plate1_pool7	187.5	117228820	52.54	255	117257542	116961657	99.75	17295838	0.29	21103353	0.36	3.18	16075605	58.46	1783	99.27	99.93	99.92	99.91	99.9	99.87	99.64
identifier#219	EDTA_plasma	CYC2	Qiaseq_cfDNA	79.6244	8	11	BioCHICseq_2_plate2_pool8	187.5	126798498	53.2	168	126820572	126583952	99.81	19090421	0.3	20562834	0.32	3.57	18625351	64.2	2109	99.15	99.66	99.63	99.62	99.59	99.54	99.4
identifier#220	EDTA_plasma	EOT	Qiaseq_cfDNA	100	8	11	BioCHICseq_2_plate1_pool7	176.48	284674866	53.16	171	284762546	284092128	99.76	44100605	0.31	46750424	0.33	3.48	40710791	63.19	4627	99.08	99.71	99.69	99.67	99.64	99.61	99.56
identifier#221	EDTA_plasma	CYC2	Qiaseq_cfDNA	100	8	11	BioCHICseq_2_plate2_pool8	187.5	257809888	53.33	170	257878822	257321129	99.78	40048471	0.31	42482418	0.33	4.02	34549558	62.58	3933	99.19	99.84	99.8	99.77	99.72	99.69	99.63
identifier#222	EDTA_plasma	EOT	Qiaseq_cfDNA	52.8114	8	11	BioCHICseq_2_plate1_pool7	187.5	82777338	52.97	223	82807410	82583304	99.73	13023706	0.31	14396592	0.35	3.18	12062970	62.16	1362	99.15	99.99	99.99	99.98	99.95	99.82	99.3
identifier#223	EDTA_plasma	CYC2	Qiaseq_cfDNA	41.9024	8	11	BioCHICseq_2_plate2_pool8	187.5	108131068	52.96	194	108156452	107920965	99.78	15773431	0.29	17516469	0.32	4.14	14341386	62.51	1652	99.16	99.95	99.94	99.92	99.89	99.74	99.34
identifier#224	EDTA_plasma	EOT	Qiaseq_cfDNA	28.9305	8	11	BioCHICseq_2_plate1_pool7	187.5	77183590	53.02	187	77210658	77006178	99.74	11524784	0.3	13121857	0.34	3.72	10495412	61.34	1204	98.87	99.95	99.93	99.92	99.85	99.55	98.83
identifier#225	STRECK_plasma	CYC2	Qiaseq_cfDNA	26.3527	8	11	BioCHICseq_2_plate2_pool8	187.5	106984402	52.49	224	107013060	106786857	99.79	15437856	0.29	17327461	0.32	5.58	10676290	57.61	1240	99.23	99.99	99.97	99.96	99.93	99.77	99.18
identifier#226	STRECK_plasma	EOT	Qiaseq_cfDNA	49.7445	8	11	BioCHICseq_2_plate1_pool7	187.5	86853356	53.34	204	86875284	86667947	99.76	12725653	0.29	14398404	0.33	3.27	12886778	63.3	1490	98.92	99.98	99.97	99.96	99.93	99.74	99.19
identifier#227	EDTA_plasma	CYC2	Qiaseq_cfDNA	48	8	11	BioCHICseq3_pool2	187.5	169402200	51.52	219.76	169722250	168949448	99.54	25497609	0.3	29312205	0.35	5.72	15245531	55.39	1725	97.98	99.56	99.51	99.47	99.4	99.26	98.51
identifier#228	EDTA_plasma	CYC2	Qiaseq_cfDNA	16.3738	8	11	BioCHICseq_2_plate2_pool8	187.5	80711866	52.36	185	80737122	80532736	99.75	12339592	0.3	14367501	0.35	7.15	6388227	55.99	718	99.27	99.94	99.91	99.87	99.81	99.48	98.51
identifier#229	EDTA_plasma	EOT	Qiaseq_cfDNA	100	8	11	BioCHICseq_2_plate1_pool7	10.14	233500974	53.7	164	233566856	233048426	99.78	36792662	0.31	38751114	0.33	3.11	35256814	64.58	3941	99.15	99.74	99.71	99.7	99.68	99.65	99.59
identifier#230	EDTA_plasma	CYC2	Qiaseq_cfDNA	87.8261	8	11	BioCHICseq_2_plate2_pool8	187.5	159342222	52.34	246	159394398	159009296	99.76	25206789	0.31	30109542	0.38	3.94	20389786	58.52	2296	99.3	100	99.99	99.98	99.97	99.94	99.72
identifier#231	EDTA_plasma	CYC4	Qiaseq_cfDNA	100	8	11	BioCHICseq3_pool7	187.5	164163808	52.47	217.73	164555632	163714472	99.49	25126509	0.31	28424348	0.35	3.6	22501221	61.84	2541	98.66	99.62	99.52	99.49	99.46	99.41	99.25
identifier#232	EDTA_plasma	EOT	Qiaseq_cfDNA	67.3249	8	11	BioCHICseq_2_plate1_pool7	187.5	131360184	52.97	181	131438408	131080800	99.73	21141583	0.32	21696588	0.33	3.09	19151663	62.52	2141	99.02	99.91	99.88	99.84	99.76	99.65	99.44
identifier#233	STRECK_plasma	FU3Mo	Qiaseq_cfDNA	84	8	11	BioCHICseq3_pool15	187.5	150203464	52.47	222.5	150530228	149753182	99.48	22901717	0.31	26382534	0.36	4.56	16569695	57.53	1919	96.14	99.54	99.49	99.46	99.4	99.24	97.62
identifier#234	STRECK_plasma	FU6Mo	Qiaseq_cfDNA	40	8	11	BioCHICseq3_pool17	187.5	139883418	51.36	220.48	140189398	139504471	99.51	21368069	0.31	23965632	0.35	6.58	11077245	53.49	1287	95.97	99.53	99.46	99.38	99.19	98.28	95.92
identifier#235	STRECK_plasma	CYC2	Qiaseq_cfDNA	34.5042	8	11	BioCHICseq_2_plate2_pool8	187.5	99509142	53.2	200	99532648	99331200	99.8	14504736	0.29	15222175	0.3	5.94	9503557	57.82	1111	99.1	99.96	99.95	99.94	99.91	99.71	98.85
identifier#236	STRECK_plasma	CYC4	Qiaseq_cfDNA	100	8	11	BioCHICseq3_pool7	187.5	120247130	53.36	171.74	120541418	119950925	99.51	16779360	0.28	18216770	0.31	3.24	18133549	64.99	2086	98.84	99.58	99.54	99.52	99.5	99.46	99.27
identifier#237	STRECK_plasma	EOT	Qiaseq_cfDNA	18.6015	8	11	BioCHICseq_2_plate1_pool7	187.5	67863016	53.51	167	67884930	67740532	99.79	9913859	0.29	10025301	0.29	3.78	9298011	62.89	1088	98.54	99.7	99.66	99.63	99.57	99.36	98.06
identifier#238	EDTA_plasma	CYC2	Qiaseq_cfDNA	42.8061	8	11	BioCHICseq_2_plate2_pool8	187.5	135816144	52.92	173	135857074	135584041	99.8	20698814	0.3	21603529	0.32	3.88	18628697	62.54	2102	99.31	99.83	99.78	99.75	99.72	99.69	99.57
identifier#239	EDTA_plasma	CYC4	Qiaseq_cfDNA	100	8	11	BioCHICseq3_pool8	187.5	186355810	52.77	170.76	186857146	185907711	99.49	26740432	0.29	29311063	0.32	3.17	27797352	63.79	3162	98.95	99.59	99.56	99.53	99.5	99.47	99.38
identifier#240	EDTA_plasma	EOT	Qiaseq_cfDNA	26.8874	8	11	BioCHICseq_2_plate1_pool8	187.5	125027156	52.79	168	125068684	124760924	99.75	19217702	0.3	21340390	0.34	4.21	15678695	60.54	1775	99.3	99.8	99.76	99.73	99.72	99.68	99.48
identifier#241	EDTA_plasma	CYC2	Qiaseq_cfDNA	82.6882	8	11	BioCHICseq_2_plate2_pool9	187.5	150552084	52.53	198	150589938	150254458	99.78	22336866	0.29	25254536	0.33	3.78	21290753	62.9	2428	99.24	99.96	99.95	99.94	99.9	99.82	99.59
identifier#242	EDTA_plasma	FU12Mo	Qiaseq_cfDNA	48	8	11	BioCHICseq3_pool12	187.5	132065350	51.44	193.53	132388398	131759300	99.52	19500954	0.3	22550024	0.35	4.36	15506512	58.45	1790	97.58	99.49	99.44	99.4	99.34	99.21	98.37
identifier#243	STRECK_plasma	FU24Mo	Qiaseq_cfDNA	28	8	11	BioCHICseq3_pool13	187.5	174014436	51.55	208.88	174378234	173435963	99.46	25643206	0.3	32552112	0.38	7.66	12126296	52.59	1423	96.12	99.47	99.43	99.36	99.25	98.74	96.41
identifier#244	EDTA_plasma	FU3Mo	Qiaseq_cfDNA	40	8	11	BioCHICseq3_pool15	187.5	107691264	51.26	174.82	107921466	107433249	99.55	15622685	0.29	16797908	0.32	4.96	11831146	60.07	1383	95.71	99.44	99.39	99.32	99.18	98.56	95.91
identifier#245	EDTA_plasma	FU6Mo	Qiaseq_cfDNA	16	8	11	BioCHICseq3_pool17	187.5	121438892	50.96	172.61	121691692	121117589	99.53	17802824	0.29	20458293	0.34	10.5	6304765	49.63	728	96.23	99.41	99.28	99.14	98.51	97.03	94.11
identifier#246	EDTA_plasma	CYC2	Qiaseq_cfDNA	22.4922	8	11	BioCHICseq_2_plate2_pool9	187.5	85263112	52.23	216	85283542	85083512	99.77	12619473	0.29	14642809	0.34	5.45	8789876	58.44	1003	99.14	99.96	99.91	99.87	99.81	99.61	98.88
identifier#247	EDTA_plasma	CYC4	Qiaseq_cfDNA	32	8	11	BioCHICseq3_pool8	187.5	56082760	52.26	170.24	56244266	55910451	99.41	8172983	0.29	9892366	0.36	3.6	7833598	62.89	896	98.59	99.48	99.44	99.41	99.34	99.08	97.75
identifier#248	EDTA_plasma	EOT	Qiaseq_cfDNA	20.3981	8	11	BioCHICseq_2_plate1_pool8	187.5	78943510	52.2	231	78969886	78742500	99.71	12169547	0.31	14071882	0.35	5.24	7927278	55.7	896	99.24	99.95	99.92	99.87	99.78	99.56	98.89
identifier#249	EDTA_plasma	CYC2	Qiaseq_cfDNA	47.8238	8	11	BioCHICseq_2_plate2_pool9	187.5	115635818	52.25	165	115662728	115442410	99.81	16929416	0.29	17959353	0.31	4.26	15199907	63.52	1732	99.05	99.64	99.59	99.57	99.53	99.47	99.22
identifier#250	EDTA_plasma	CYC4	Qiaseq_cfDNA	100	8	11	BioCHICseq3_pool8	187.5	45003600	49.93	170.54	45083962	44789263	99.35	6305446	0.28	7221553	0.33	4.14	4951259	53.47	559	97.95	99.42	99.34	99.22	98.98	98.19	93.04
identifier#251	EDTA_plasma	EOT	Qiaseq_cfDNA	39.1618	8	11	BioCHICseq_2_plate1_pool8	55.64	21013578	51.48	217	21022402	20966290	99.73	3251290	0.31	3766339	0.36	9.06	1225351	49.84	137	99.31	99.68	99.4	99.26	98.57	86.67	0.25
identifier#252	CSF_fluid	Baseline	Qiaseq_cfDNA	0	8	12	BioCHICseq3_pool1	0.805	36898168	51.34	142.75	38583648	36033626	93.39	9273045	0.51	10245547	0.58	810.01	19961	13.45	2	77.88	0.71	0.11	0.04	0.01	0.01	0.03
identifier#253	EDTA_plasma	CYC2	Qiaseq_cfDNA	63.1984	8	11	BioCHICseq_2_plate2_pool9	187.5	137583006	52.45	186	137620304	137292145	99.76	21174509	0.31	23824608	0.34	4.36	17432040	61.43	1970	99.26	99.95	99.93	99.92	99.86	99.73	99.45
identifier#254	EDTA_plasma	CYC4	Qiaseq_cfDNA	100	8	11	BioCHICseq3_pool8	187.5	258980368	52.53	168.56	259618244	258355560	99.51	39084665	0.3	40545454	0.32	3.34	38249822	64.1	4297	98.92	99.53	99.45	99.43	99.38	99.34	99.28
identifier#255	EDTA_plasma	EOT	Qiaseq_cfDNA	68.1792	8	11	BioCHICseq_2_plate1_pool8	187.5	155092902	52.12	222	155128040	154695816	99.72	24328395	0.31	29541860	0.38	3.78	20317948	58.58	2291	99.2	99.99	99.98	99.97	99.96	99.86	99.61
identifier#256	EDTA_plasma	FU3Mo	Qiaseq_cfDNA	24	8	11	BioCHICseq3_pool15	187.5	90795330	50.26	228.25	90973342	90525488	99.51	13368599	0.29	16129219	0.36	7.1	6746545	52.54	784	94.88	99.47	99.25	98.81	97.9	95.94	93
identifier#257	EDTA_plasma	CYC2	Qiaseq_cfDNA	36.45	8	11	BioCHICseq_2_plate2_pool9	187.5	107642984	52.71	168	107661502	107489472	99.84	15961133	0.29	16847847	0.31	4.52	13502362	62.97	1552	99.24	99.78	99.75	99.74	99.71	99.65	99.4
identifier#258	EDTA_plasma	CYC2	Qiaseq_cfDNA	100	8	11	BioCHICseq_2_plate2_pool9	187.5	226966834	52.63	164	227030944	226601230	99.81	33926589	0.3	35782146	0.31	3.84	32334182	64.54	3701	99.07	99.73	99.7	99.68	99.66	99.59	99.52
identifier#259	EDTA_plasma	CYC4	Qiaseq_cfDNA	100	8	11	BioCHICseq3_pool8	187.5	129529592	52.53	166.86	129910028	129262399	99.5	19170019	0.3	19689774	0.31	3.09	19802177	64.95	2254	98.79	99.5	99.46	99.43	99.39	99.35	99.22
identifier#260	EDTA_plasma	EOT	Qiaseq_cfDNA	100	8	11	BioCHICseq_2_plate1_pool8	85.46	273841326	53.01	170	273896182	273294421	99.78	41952605	0.3	44849118	0.33	3.15	41170134	63.35	4651	99.21	99.8	99.75	99.72	99.7	99.66	99.61
identifier#261	EDTA_plasma	CYC2	Qiaseq_cfDNA	100	8	11	BioCHICseq_2_plate2_pool9	187.5	214263924	52.22	165	214299002	213935849	99.83	31641704	0.29	32581380	0.3	3.91	29944018	63.59	3394	99.21	99.7	99.66	99.65	99.63	99.59	99.52
identifier#262	EDTA_plasma	CYC4	Qiaseq_cfDNA	100	8	11	BioCHICseq3_pool8	109.457	326977180	52.27	163.28	327916042	326270294	99.5	47900501	0.29	47878283	0.3	3.3	50042598	65.5	5689	98.32	99.54	99.48	99.45	99.43	99.39	99.32
identifier#263	EDTA_plasma	EOT	Qiaseq_cfDNA	100	8	11	BioCHICseq_2_plate1_pool9	81.34	16218734	52.12	167	16233018	16189391	99.73	2459583	0.3	2590078	0.32	6.44	1384604	56.05	156	99.23	99.54	99.41	99.26	98.41	87.51	2.2
identifier#264	STRECK_plasma	FU12Mo	Qiaseq_cfDNA	20	8	11	BioCHICseq3_pool12	187.5	121077026	51.71	170.91	121407550	120787823	99.49	18414842	0.3	19774123	0.33	6.76	9524576	53.03	1097	96.69	99.48	99.41	99.3	99	98.09	96.34
identifier#265	STRECK_plasma	FU18Mo	Qiaseq_cfDNA	36	8	11	BioCHICseq3_pool12	187.5	120186592	51.07	202.74	120477820	119859540	99.49	17825318	0.3	19531086	0.33	5.75	10775551	53.65	1242	96.44	99.5	99.4	99.29	98.96	98.02	96.35
identifier#266	EDTA_plasma	FU3Mo	Qiaseq_cfDNA	44	8	11	BioCHICseq3_pool15	187.5	109461090	50.54	227.52	109710636	109133734	99.47	15920088	0.29	19478314	0.36	4.79	11770654	57.43	1373	95.19	99.55	99.47	99.39	99.22	98.27	95.33
identifier#267	EDTA_plasma	FU6Mo	Qiaseq_cfDNA	36	8	11	BioCHICseq3_pool17	187.5	132432742	50.56	203.53	132713076	132111302	99.55	19239778	0.29	21671742	0.33	6.83	10395193	53.79	1204	96.07	99.51	99.43	99.35	99.23	98.27	95.83
identifier#268	STRECK_plasma	FU9Mo	Qiaseq_cfDNA	20	8	11	BioCHICseq3_pool18	187.5	120431678	50.44	226.79	120699468	120008832	99.43	18095800	0.3	23308948	0.39	10.89	5552744	47.47	630	97.53	99.5	99.38	99.27	98.92	97.89	94.93
identifier#269	EDTA_plasma	CYC4	Qiaseq_cfDNA	76	8	11	BioCHICseq3_pool8	187.5	111753040	52.44	171.65	112046056	111467702	99.48	16615273	0.3	17929261	0.33	3.4	16251627	63.81	1825	98.77	99.58	99.49	99.45	99.4	99.34	99.09
identifier#270	EDTA_plasma	CYC2	Qiaseq_cfDNA	43.3953	8	11	BioCHICseq_2_plate2_pool9	187.5	121627438	52.89	199	121661096	121404569	99.79	18737672	0.31	20694952	0.34	4.22	15620968	61.33	1773	99.13	99.97	99.95	99.92	99.88	99.78	99.44
identifier#271	EDTA_plasma	EOT	Qiaseq_cfDNA	100	8	11	BioCHICseq_2_plate1_pool9	187.5	249325370	52.97	186	249408878	248679109	99.71	39250230	0.31	45036027	0.36	3.42	34921787	61.34	3956	99.04	99.97	99.96	99.95	99.92	99.88	99.75
identifier#272	EDTA_plasma	CYC2	Qiaseq_cfDNA	81.8481	8	11	BioCHICseq_2_plate2_pool10	187.5	163074676	52.3	174	163107134	162803028	99.81	25311420	0.31	26622436	0.32	3.88	22497095	62.75	2587	99.14	99.94	99.91	99.89	99.85	99.79	99.53
identifier#273	EDTA_plasma	EOT	Qiaseq_cfDNA	47.5266	8	11	BioCHICseq_2_plate1_pool9	187.5	56618322	53.78	213	56634694	56486519	99.74	9362450	0.33	10432720	0.37	2.95	8408171	63.57	929	99.27	99.98	99.97	99.94	99.92	99.7	98.89
identifier#274	EDTA_plasma	CYC2	Qiaseq_cfDNA	45.4478	8	11	BioCHICseq_2_plate2_pool10	187.5	120504454	52.48	206	120538700	120283962	99.79	19208637	0.32	20297537	0.33	4.34	15193397	61.17	1725	99.26	99.97	99.96	99.94	99.9	99.79	99.46
identifier#275	EDTA_plasma	EOT	Qiaseq_cfDNA	28.9376	8	11	BioCHICseq_2_plate1_pool9	187.5	50544032	52.66	234	50555984	50430124	99.75	8269182	0.32	9418333	0.37	3.47	7008861	60.79	786	99.35	99.99	99.97	99.95	99.89	99.68	98.59
identifier#276	EDTA_plasma	CYC2	Qiaseq_cfDNA	76.2872	8	11	BioCHICseq_2_plate2_pool10	187.5	156944972	52.49	217	156990096	156610960	99.76	24035904	0.3	28000663	0.35	4.07	20555077	60.94	2354	99.09	99.96	99.95	99.93	99.9	99.77	99.43
identifier#277	EDTA_plasma	EOT	Qiaseq_cfDNA	47.4018	8	11	BioCHICseq_2_plate1_pool9	187.5	73413538	53.45	217	73441326	73227713	99.71	11873058	0.32	13513026	0.37	3.1	10839174	62.86	1216	99.08	99.94	99.89	99.83	99.77	99.59	99.11
identifier#278	EDTA_plasma	CYC2	Qiaseq_cfDNA	47.1032	8	11	BioCHICseq_2_plate2_pool10	187.5	122067880	51.14	252	122092864	121854987	99.81	17075790	0.28	20132918	0.33	4.86	13340321	56.58	1527	99.16	99.93	99.92	99.89	99.87	99.78	99.31
identifier#279	EDTA_plasma	EOT	Qiaseq_cfDNA	100	8	11	BioCHICseq_2_plate1_pool9	187.5	225343632	53.05	221	225410448	224815246	99.74	32609851	0.29	39250870	0.35	3.32	31856375	60.98	3591	99.05	99.93	99.93	99.92	99.88	99.86	99.71
identifier#280	EDTA_plasma	CYC2	Qiaseq_cfDNA	36.3929	8	11	BioCHICseq_2_plate2_pool10	187.5	112636112	52.51	165	112679128	112462567	99.81	17078137	0.3	17534276	0.31	4.53	13810202	61.65	1566	99.26	99.74	99.7	99.68	99.65	99.59	99.37
identifier#281	EDTA_plasma	CYC4	Qiaseq_cfDNA	100	8	11	BioCHICseq3_pool8	187.5	159813320	52.25	166.46	160301380	159439460	99.46	24047788	0.3	24380666	0.31	3.33	23302717	63.69	2627	98.8	99.56	99.5	99.48	99.46	99.4	99.21
identifier#282	STRECK_plasma	EOT	Qiaseq_cfDNA	26.8063	8	11	BioCHICseq_2_plate1_pool9	187.5	57283650	54.02	209	57296708	57147969	99.74	9061305	0.31	9948417	0.35	3.35	8070775	61.37	908	99.23	99.99	99.99	99.98	99.92	99.63	98.68
identifier#283	EDTA_plasma	CYC2	Qiaseq_cfDNA	100	8	11	BioCHICseq_2_plate2_pool10	187.5	170806382	53.2	169	170848982	170508593	99.8	27240218	0.32	27919074	0.32	3.43	25458619	64.08	2890	99.18	99.73	99.67	99.64	99.61	99.56	99.46
identifier#284	EDTA_plasma	CYC4	Qiaseq_cfDNA	100	8	11	BioCHICseq3_pool9	113.229	178833832	53.18	167.48	179244476	178381502	99.52	27919058	0.31	28862523	0.33	2.93	27974964	66.67	3168	98.81	99.56	99.47	99.45	99.43	99.39	99.29
identifier#285	STRECK_plasma	EOT	Qiaseq_cfDNA	100	8	11	BioCHICseq_2_plate1_pool9	151.54	172176242	52.68	172	172237366	171764217	99.73	27610927	0.32	30823267	0.36	3.16	24545936	61.91	2773	99.1	99.74	99.68	99.66	99.61	99.56	99.46
identifier#286	STRECK_plasma	CYC2	Qiaseq_cfDNA	15.3108	8	11	BioCHICseq_2_plate2_pool10	187.5	89352398	52.99	165	89387794	89191953	99.78	13607539	0.3	14773194	0.33	6.03	8601664	59.59	987	99.14	99.61	99.59	99.56	99.52	99.4	98.91
identifier#287	STRECK_plasma	CYC4	Qiaseq_cfDNA	100	8	11	BioCHICseq3_pool9	187.5	173702184	53	167.54	174105354	173266414	99.52	25493268	0.29	28550493	0.33	3.19	26890258	66.25	3045	98.77	99.55	99.48	99.46	99.44	99.37	99.23
identifier#288	STRECK_plasma	EOT	Qiaseq_cfDNA	40.8077	8	11	BioCHICseq_2_plate1_pool10	187.5	135377966	53.35	208	135410442	135054685	99.74	21080481	0.31	24240832	0.36	4.23	16833428	59.16	1918	99.22	99.91	99.89	99.89	99.88	99.84	99.53
identifier#289	STRECK_plasma	CYC2	Qiaseq_cfDNA	32	8	11	BioCHICseq3_pool2	187.5	135731150	51.77	180.33	135991448	135365954	99.54	19946321	0.29	21792705	0.33	5.46	13076722	56.82	1515	97.6	99.55	99.47	99.41	99.27	98.95	97.9
identifier#290	STRECK_plasma	CYC2	Qiaseq_cfDNA	20	8	11	BioCHICseq3_pool2	187.5	121775174	52.72	169.5	122038424	121350191	99.44	19307003	0.32	23650647	0.39	6.97	9335827	54.99	1086	97.94	99.5	99.45	99.38	99.25	98.89	97.55
identifier#291	STRECK_plasma	CYC2	Qiaseq_cfDNA	100	8	11	BioCHICseq3_pool3	187.5	243610304	53.66	169.12	244188872	242923130	99.48	36209594	0.3	40553029	0.34	3.39	35368166	63.94	3994	98.93	99.59	99.49	99.47	99.45	99.42	99.38
identifier#292	STRECK_plasma	CYC2	Qiaseq_cfDNA	46.7357	8	11	BioCHICseq_2_plate2_pool11	187.5	138809756	52.7	168	138833580	138600742	99.83	20477683	0.29	20985225	0.3	4.37	17678795	62.38	2042	99.04	99.66	99.59	99.57	99.55	99.48	99.29
identifier#293	STRECK_plasma	CYC4	Qiaseq_cfDNA	44	8	11	BioCHICseq3_pool9	187.5	55277420	52.26	170.7	55390026	55152107	99.57	7742791	0.28	8565637	0.31	3.15	8486007	65.86	986	96.45	99.41	99.35	99.28	99.16	98.21	95.24
identifier#294	STRECK_plasma	EOT	Qiaseq_cfDNA	36.2218	8	11	ValeriaSEQ_2_cfDNA_pool2	187.5	215838704	52.01	170	215936492	215216537	99.67	38375033	0.35	42531334	0.39	4.83	22776930	55.81	2638	98.99	99.7	99.61	99.59	99.57	99.52	99.39
identifier#295	STRECK_plasma	CYC2	Qiaseq_cfDNA	100	8	11	BioCHICseq_2_plate2_pool11	187.5	276558598	53.44	161	276656192	276127035	99.81	44578899	0.32	45658817	0.33	4.25	36591175	63.72	4169	98.88	99.72	99.66	99.64	99.61	99.56	99.46
identifier#296	STRECK_plasma	CYC4	Qiaseq_cfDNA	100	8	11	BioCHICseq3_pool9	187.5	91087826	53.11	164.63	91276900	90893832	99.58	13783327	0.3	14061163	0.31	2.9	14651239	67.87	1670	98.54	99.47	99.44	99.4	99.36	99.28	98.92
identifier#297	STRECK_plasma	EOT	Qiaseq_cfDNA	64.4451	8	11	ValeriaSEQ_2_cfDNA_pool2	187.5	330054552	52.27	163	330240286	329280832	99.71	64308571	0.39	60354657	0.36	4.39	39178557	58.49	4514	99.06	99.74	99.67	99.65	99.62	99.57	99.53
identifier#298	STRECK_plasma	CYC2	Qiaseq_cfDNA	58.786	8	11	BioCHICseq_2_plate2_pool11	187.5	136156326	52.87	168	136182398	135928186	99.81	21645858	0.32	22786526	0.33	4.16	17836705	62.24	2042	99.07	99.79	99.74	99.72	99.69	99.63	99.41
identifier#299	STRECK_plasma	CYC4	Qiaseq_cfDNA	100	8	11	BioCHICseq3_pool9	187.5	209318456	52.84	172.54	209749506	208811828	99.55	32260323	0.31	35439328	0.34	3.31	30805746	64.15	3491	98.69	99.63	99.57	99.55	99.51	99.44	99.35
identifier#300	STRECK_plasma	EOT	Qiaseq_cfDNA	49.1017	8	11	ValeriaSEQ_2_cfDNA_pool11	214.286	115379434	53.15	155	115425094	115114017	99.73	21039639	0.36	20888664	0.36	3.6	17266913	66.34	1878	95.56	99.92	99.86	99.81	99.73	99.61	98.99
identifier#301	STRECK_plasma	CYC2	Qiaseq_cfDNA	59.6349	8	11	BioCHICseq_2_plate2_pool11	187.5	136458910	52.29	170	136495146	136222612	99.8	20075383	0.29	21889036	0.32	4.33	17303179	61.72	1996	98.98	99.71	99.65	99.63	99.59	99.52	99.29
identifier#302	STRECK_plasma	CYC4	Qiaseq_cfDNA	32	8	11	BioCHICseq3_pool9	187.5	52026332	52.16	169.16	52128720	51926953	99.61	7329791	0.28	7459055	0.29	3.48	7741101	65.65	903	95.64	99.5	99.37	99.25	98.71	97.25	94.32
identifier#303	STRECK_plasma	EOT	Qiaseq_cfDNA	31.0861	8	11	ValeriaSEQ_2_cfDNA_pool2	187.5	144734926	51.33	197	144831690	144232585	99.59	26129038	0.36	29374990	0.4	4.59	15948569	55.74	1828	99.06	99.95	99.94	99.92	99.87	99.75	99.35
identifier#304	STRECK_plasma	CYC2	Qiaseq_cfDNA	56	8	11	BioCHICseq3_pool3	187.5	50980722	52.17	197.26	51093898	50853638	99.53	7376505	0.29	8305304	0.33	2.98	7739322	64.51	882	98.43	99.48	99.4	99.35	99.24	98.96	97.47
identifier#305	EDTA_plasma	CYC2	Qiaseq_cfDNA	31.4156	8	11	BioCHICseq_2_plate2_pool11	187.5	134658796	52.64	219	134687950	134391214	99.78	19541953	0.29	22828209	0.34	5.53	13714526	58.17	1576	99.35	100	99.98	99.96	99.95	99.89	99.49
identifier#306	EDTA_plasma	CYC4	Qiaseq_cfDNA	100	8	11	BioCHICseq3_pool9	187.5	143462412	52.52	188.01	143792438	143093921	99.51	21243520	0.3	23570509	0.33	3.15	21537507	64.23	2420	98.84	99.62	99.56	99.52	99.48	99.43	99.26
identifier#307	EDTA_plasma	EOT	Qiaseq_cfDNA	31.779	8	11	BioCHICseq_2_plate1_pool10	187.5	106509312	53.02	221	106541950	106250187	99.73	15848621	0.29	17886533	0.33	4.43	12874952	59.4	1476	99.38	99.99	99.98	99.96	99.95	99.87	99.53
identifier#308	EDTA_plasma	CYC2	Qiaseq_cfDNA	26.2961	8	11	BioCHICseq_2_plate2_pool11	187.5	127266324	52.44	220	127303858	126998592	99.76	19396399	0.3	22121711	0.35	5.77	12412904	57.53	1410	99.24	99.96	99.94	99.91	99.86	99.77	99.32
identifier#309	EDTA_plasma	CYC4	Qiaseq_cfDNA	100	8	11	BioCHICseq3_pool9	187.5	216056116	52.57	169.03	216559846	215396219	99.46	30958901	0.29	37901908	0.36	3.29	32043919	64.46	3647	98.69	99.51	99.46	99.41	99.39	99.32	99.23
identifier#310	EDTA_plasma	EOT	Qiaseq_cfDNA	100	8	11	BioCHICseq_2_plate1_pool10	187.5	265074278	52.34	216	265177012	264492167	99.74	40918624	0.31	44156332	0.33	4.17	32674115	58.39	3701	99.24	99.98	99.97	99.97	99.96	99.91	99.8
identifier#311	EDTA_plasma	CYC2	Qiaseq_cfDNA	70.9183	8	11	BioCHICseq_2_plate2_pool11	187.5	141258414	52.78	200	141304474	141012452	99.79	21294580	0.3	22732168	0.32	3.94	19207068	61.89	2188	99.23	99.94	99.94	99.94	99.92	99.86	99.56
identifier#312	EDTA_plasma	CYC4	Qiaseq_cfDNA	100	8	11	BioCHICseq3_pool10	187.5	299830064	52.88	166.27	300485610	299127313	99.55	44783773	0.3	47979161	0.32	3.63	43133697	64.54	4933	98.68	99.66	99.62	99.58	99.54	99.5	99.4
identifier#313	EDTA_plasma	EOT	Qiaseq_cfDNA	44.2922	8	11	BioCHICseq_2_plate1_pool10	187.5	96726172	53.5	171	96755224	96502148	99.74	15100184	0.31	17085083	0.35	3.8	13264821	62.02	1502	99.2	99.88	99.8	99.76	99.69	99.6	99.38
identifier#314	EDTA_plasma	CYC2	Qiaseq_cfDNA	29.7891	8	11	BioCHICseq_2_plate2_pool11	187.5	131276164	52.28	211	131304590	131032879	99.79	19221468	0.29	21923565	0.33	6	12334917	57.21	1415	99.32	99.99	99.97	99.96	99.95	99.85	99.39
identifier#315	EDTA_plasma	EOT	Qiaseq_cfDNA	24.9125	8	11	BioCHICseq_2_plate1_pool10	187.5	85424940	52.67	221	85442722	85224693	99.74	12643425	0.29	15131624	0.35	4.9	9306208	57.73	1066	99.35	99.99	99.98	99.96	99.93	99.74	99.2
identifier#316	EDTA_plasma	CYC2	Qiaseq_cfDNA	77.748	8	11	BioCHICseq_2_plate2_pool12	187.5	157992432	52.22	251	158029882	157684102	99.78	26120594	0.33	30897176	0.39	4.14	18644483	55.98	2096	99.38	99.9	99.9	99.9	99.9	99.9	99.76
identifier#317	EDTA_plasma	EOT	Qiaseq_cfDNA	27.2338	8	11	BioCHICseq_2_plate1_pool10	187.5	103678648	52.85	222	103702350	103441312	99.75	16886268	0.32	19193314	0.37	4.57	11881060	57.99	1342	99.33	99.91	99.91	99.91	99.91	99.83	99.42
identifier#318	EDTA_plasma	CYC2	Qiaseq_cfDNA	100	8	11	BioCHICseq_2_plate2_pool12	187.5	239063924	52.82	239	239129114	238591451	99.78	36281781	0.3	44595966	0.37	4.46	27974467	57.54	3118	99.58	100	100	99.99	99.99	99.99	99.96
identifier#319	EDTA_plasma	EOT	Qiaseq_cfDNA	100	8	11	BioCHICseq_2_plate1_pool10	187.5	205522154	53.14	179	205560808	205124584	99.79	31270655	0.3	33275127	0.32	3.87	27118912	60.14	3018	99.44	99.99	99.99	99.98	99.97	99.91	99.8
identifier#320	EDTA_plasma	CYC2	Qiaseq_cfDNA	36.1413	8	11	BioCHICseq_2_plate2_pool12	187.5	138751010	53.11	238	138809000	138438355	99.73	21736299	0.31	26265281	0.38	5.32	14001255	56.23	1600	99.05	100	99.99	99.98	99.96	99.89	99.38
identifier#321	STRECK_plasma	CYC4	Qiaseq_cfDNA	100	8	11	BioCHICseq3_pool10	187.5	220791436	52.08	213.48	221235358	220237990	99.55	33071181	0.3	37087177	0.34	4	27585237	59.48	3147	98.21	99.68	99.6	99.57	99.53	99.47	99.3
identifier#322	STRECK_plasma	EOT	Qiaseq_cfDNA	34.1852	8	11	BioCHICseq_2_plate1_pool10	187.5	126960608	52.48	235	127010054	126665983	99.73	19763622	0.31	22567997	0.35	5.14	13033871	56.04	1499	99.16	100	99.98	99.97	99.95	99.85	99.35
identifier#323	STRECK_plasma	CYC2	Qiaseq_cfDNA	41.4013	8	11	BioCHICseq_2_plate2_pool12	187.5	144832536	52.21	212	144859386	144568618	99.8	22448927	0.31	24438960	0.34	5.69	14098807	56.94	1605	99.34	99.93	99.92	99.9	99.88	99.86	99.51
identifier#324	STRECK_plasma	EOT	Qiaseq_cfDNA	15.9414	8	11	BioCHICseq_2_plate1_pool11	187.5	65246482	54.18	181	65263544	65097029	99.74	10569786	0.32	11556832	0.35	4.8	7295301	59.43	835	99.08	99.89	99.88	99.85	99.77	99.55	97.84
identifier#325	STRECK_plasma	CYC2	Qiaseq_cfDNA	87.9749	8	11	BioCHICseq_2_plate2_pool12	187.5	167522552	52.77	173	167608224	167218678	99.77	26051610	0.31	27037044	0.32	3.96	22565892	62.09	2567	99.04	99.73	99.67	99.63	99.58	99.52	99.35
identifier#326	STRECK_plasma	EOT	Qiaseq_cfDNA	23.3556	8	11	BioCHICseq_2_plate1_pool11	187.5	76835056	52.86	223	76857894	76661906	99.74	12084676	0.31	13326835	0.34	4.76	8640095	58.54	983	99.23	99.96	99.94	99.92	99.87	99.62	99.04
identifier#327	EDTA_plasma	CYC2	Qiaseq_cfDNA	7.78225	8	11	BioCHICseq_2_plate2_pool12	187.5	105416474	50.72	169	105440498	105256113	99.83	15583109	0.29	16058562	0.3	12.21	4867983	48.43	560	99.04	99.62	99.57	99.55	99.49	99.1	93.96
identifier#328	EDTA_plasma	EOT	Qiaseq_cfDNA	8.49109	8	11	BioCHICseq_2_plate1_pool11	187.5	56505338	52.26	168	56523014	56397723	99.78	8351855	0.29	9173630	0.32	5.22	6101962	60.43	704	99.12	99.64	99.59	99.57	99.54	99.32	97.35
identifier#329	STRECK_plasma	CYC2	Qiaseq_cfDNA	64.9666	8	11	BioCHICseq_2_plate1_pool1	187.5	188191904	52.78	199	188244892	187757655	99.74	30483920	0.32	33860212	0.36	4.36	22723347	58.74	2596	99.26	99.93	99.92	99.91	99.91	99.88	99.66
identifier#330	STRECK_plasma	CYC2	Qiaseq_cfDNA	19.6105	8	11	BioCHICseq_2_plate1_pool2	187.5	127198022	51.88	193	127240908	126907797	99.74	20136086	0.31	21828970	0.34	7.32	9366921	51.26	1067	99.38	99.97	99.96	99.95	99.94	99.79	99.24
identifier#331	STRECK_plasma	CYC4	Qiaseq_cfDNA	56	8	11	BioCHICseq3_pool10	187.5	76885824	52.9	219.32	77037012	76646990	99.49	11842893	0.31	14403793	0.38	3.37	10767273	61.68	1234	97.3	99.62	99.56	99.51	99.4	99.15	97.2

## Sheet: Table_S4B
Table S4B. Measurable residual disease metrics per sample. LOD95, limit of detection modelled at 95% sensitivity and 5% false positive rate.
Identifier	Time point	cfDNA material	N Reporters	Altered Reads	Informative Duplex Depth	Background Rate	P value	MRD decision	LOD95
identifier#1	CYC2	EDTA_plasma	60	7	124850	2.05319e-06	9.9999e-06	positive	2.44052e-05
identifier#2	CYC4	EDTA_plasma	60	0	74490	1.99688e-06	1	negative	4.09043e-05
identifier#3	EOT	EDTA_plasma	60	0	62946	2.14706e-06	1	negative	4.84058e-05
identifier#4	CYC2	EDTA_plasma	72	0	28317	3.7821e-06	1	negative	0.000107598
identifier#5	CYC4	EDTA_plasma	72	0	19357	2.29536e-06	1	negative	0.0001574
identifier#6	EOT	EDTA_plasma	72	0	47593	2.7498e-06	1	negative	6.40205e-05
identifier#7	EOT	EDTA_plasma	295	0	202414	3.56267e-06	1	negative	1.50533e-05
identifier#8	CYC2	EDTA_plasma	Genotyping Failed	NA	NA	NA	NA	negative	NA
identifier#9	CYC4	EDTA_plasma	Genotyping Failed	NA	NA	NA	NA	negative	NA
identifier#10	EOT	EDTA_plasma	Genotyping Failed	NA	NA	NA	NA	negative	NA
identifier#11	CYC2	EDTA_plasma	110	2	98044	2.63881e-06	5.99994e-05	positive	3.10777e-05
identifier#12	EOT	EDTA_plasma	110	0	71620	4.50097e-06	1	negative	4.25434e-05
identifier#13	CYC2	EDTA_plasma	252	1	185267	2.42012e-06	0.0598594	negative	1.64465e-05
identifier#14	EOT	EDTA_plasma	252	0	137734	5.4144e-06	1	negative	2.21223e-05
identifier#15	CYC2	EDTA_plasma	176	5	374751	2.30972e-06	9.9999e-06	positive	8.13077e-06
identifier#16	EOT	STRECK_plasma	176	0	128054	2.97356e-06	1	negative	2.37946e-05
identifier#17	CYC2	STRECK_plasma	Genotyping Failed	NA	NA	NA	NA	negative	NA
identifier#18	CYC4	STRECK_plasma	Genotyping Failed	NA	NA	NA	NA	negative	NA
identifier#19	EOT	STRECK_plasma	Genotyping Failed	NA	NA	NA	NA	negative	NA
identifier#20	CYC2	STRECK_plasma	284	0	105553	2.64186e-06	1	negative	2.88668e-05
identifier#21	CYC2	STRECK_plasma	325	0	181701	3.76081e-06	1	negative	1.67693e-05
identifier#22	CYC2	EDTA_plasma	231	79	252483	2.208e-06	9.9999e-06	positive	1.20682e-05
identifier#23	CYC4	EDTA_plasma	403	1	390815	1.44442e-06	0.158448	negative	7.79656e-06
identifier#24	EOT	EDTA_plasma	403	0	322941	3.58348e-06	1	negative	9.43519e-06
identifier#25	CYC2	EDTA_plasma	296	2	180710	4.7167e-06	0.000649994	negative	1.68613e-05
identifier#26	EOT	EDTA_plasma	296	2	377991	6.28743e-06	0.129619	negative	8.06107e-06
identifier#27	CYC2	STRECK_plasma	157	0	92349	1.54338e-06	1	negative	3.29941e-05
identifier#28	EOT	STRECK_plasma	157	1	77488	2.74204e-06	0.0266697	negative	3.93218e-05
identifier#29	CYC2	STRECK_plasma	98	0	65537	1.96728e-06	1	negative	4.64921e-05
identifier#30	EOT	STRECK_plasma	98	0	111924	1.68486e-06	1	negative	2.72237e-05
identifier#31	CYC2	EDTA_plasma	24	0	16645	1.48311e-06	1	negative	0.000183043
identifier#32	CYC2	EDTA_plasma	401	6	354828	6.31548e-06	2.99997e-05	positive	8.58729e-06
identifier#33	CYC2	EDTA_plasma	381	505	180082	3.71102e-06	9.9999e-06	positive	1.69201e-05
identifier#34	CYC4	EDTA_plasma	381	308	381850	1.75049e-06	9.9999e-06	positive	7.97961e-06
identifier#35	EOT	EDTA_plasma	381	4189	327639	2.93512e-06	9.9999e-06	positive	9.2999e-06
identifier#36	FU3Mo	EDTA_plasma	381	8191	206489	2.35779e-06	9.9999e-06	positive	1.47562e-05
identifier#37	PD	EDTA_plasma	381	301	334560	2.32409e-06	9.9999e-06	positive	9.10752e-06
identifier#38	CYC2	STRECK_plasma	337	0	221997	1.97616e-06	1	negative	1.37254e-05
identifier#39	CYC4	STRECK_plasma	337	0	196807	2.07469e-06	1	negative	1.54822e-05
identifier#40	EOT	STRECK_plasma	337	1	397545	2.15512e-06	0.0627494	negative	7.66458e-06
identifier#41	CYC2	STRECK_plasma	127	45	81429	1.86576e-06	9.9999e-06	positive	3.74187e-05
identifier#42	CYC4	STRECK_plasma	127	13	46918	4.13539e-06	9.9999e-06	positive	6.49415e-05
identifier#43	EOT	EDTA_plasma	127	10	41585	4.06016e-06	0.000119999	negative	7.32695e-05
identifier#44	CYC2	STRECK_plasma	131	1	155426	1.68659e-06	0.0576494	negative	1.96042e-05
identifier#45	EOT	STRECK_plasma	131	0	69486	3.69748e-06	1	negative	4.385e-05
identifier#46	CYC2	EDTA_plasma	161	1	113492	2.20459e-06	0.0224298	negative	2.68476e-05
identifier#47	CYC4	EDTA_plasma	161	0	92392	2.16735e-06	1	negative	3.29788e-05
identifier#48	EOT	EDTA_plasma	161	0	146683	4.0324e-06	1	negative	2.07726e-05
identifier#49	FU12Mo	STRECK_plasma	161	0	90534	4.00402e-06	1	negative	3.36556e-05
identifier#50	FU24Mo	STRECK_plasma	161	1	127785	3.52966e-06	0.0381196	negative	2.38447e-05
identifier#51	FU3Mo	EDTA_plasma	161	0	122267	6.26742e-06	1	negative	2.49208e-05
identifier#52	FU6Mo	EDTA_plasma	161	1	105831	6.40021e-06	0.188518	negative	2.8791e-05
identifier#53	CYC2	EDTA_plasma	449	64	364857	2.38499e-06	9.9999e-06	positive	8.35125e-06
identifier#54	CYC4	EDTA_plasma	449	0	257260	1.72693e-06	1	negative	1.18441e-05
identifier#55	EOT	EDTA_plasma	449	2	312346	3.11223e-06	0.0217298	negative	9.75524e-06
identifier#56	CYC2	EDTA_plasma	573	2	316325	3.37718e-06	0.0493895	negative	9.63253e-06
identifier#57	CYC4	EDTA_plasma	573	2	246414	2.66383e-06	0.0162998	negative	1.23654e-05
identifier#58	EOT	EDTA_plasma	573	0	246343	5.76508e-06	1	negative	1.2369e-05
identifier#59	CYC2	EDTA_plasma	68	1	57263	2.10788e-06	0.0388196	negative	5.32097e-05
identifier#60	EOT	EDTA_plasma	68	0	55274	2.38024e-06	1	negative	5.51243e-05
identifier#61	EOT	STRECK_plasma	148	0	126428	7.93754e-06	1	negative	2.41006e-05
identifier#62	CYC2	STRECK_plasma	157	3	201778	2.80853e-06	0.000479995	negative	1.51008e-05
identifier#63	EOT	STRECK_plasma	157	2	187942	4.32843e-06	0.00795992	negative	1.62125e-05
identifier#64	FU3Mo	STRECK_plasma	157	0	140543	4.19342e-06	1	negative	2.16801e-05
identifier#65	FU6Mo	STRECK_plasma	157	10	109072	5.65175e-06	9.9999e-06	positive	2.79355e-05
identifier#66	FU9Mo	STRECK_plasma	157	18	117137	2.53988e-06	9.9999e-06	positive	2.60122e-05
identifier#67	CYC2	STRECK_plasma	134	1	127985	3.99591e-06	0.0377096	negative	2.38074e-05
identifier#68	EOT	STRECK_plasma	134	0	321109	2.55286e-06	1	negative	9.48902e-06
identifier#69	CYC2	EDTA_plasma	125	0	101007	2.43298e-06	1	negative	3.0166e-05
identifier#70	CYC4	EDTA_plasma	125	0	89930	1.62871e-06	1	negative	3.38816e-05
identifier#71	EOT	EDTA_plasma	125	0	115009	1.71597e-06	1	negative	2.64935e-05
identifier#72	CYC2	EDTA_plasma	278	1	253060	2.84418e-06	0.184268	negative	1.20407e-05
identifier#73	EOT	EDTA_plasma	278	0	510004	1.81837e-06	1	negative	5.9745e-06
identifier#74	CYC2	EDTA_plasma	75	117	49757	2.89237e-06	9.9999e-06	positive	6.12363e-05
identifier#75	EOT	EDTA_plasma	75	0	84818	3.8344e-06	1	negative	3.59236e-05
identifier#76	CYC2	EDTA_plasma	491	5	507707	3.54829e-06	0.000119999	negative	6.00153e-06
identifier#77	CYC4	EDTA_plasma	491	0	142240	3.17137e-06	1	negative	2.14215e-05
identifier#78	EOT	EDTA_plasma	491	1	667405	5.11186e-06	0.321577	negative	4.56547e-06
identifier#79	CYC2	EDTA_plasma	265	5	567770	1.95507e-06	9.9999e-06	positive	5.36664e-06
identifier#80	CYC4	EDTA_plasma	265	1	268201	1.6637e-06	0.127359	negative	1.13609e-05
identifier#81	EOT	EDTA_plasma	265	1	435136	3.48335e-06	0.293727	negative	7.00244e-06
identifier#82	CYC2	EDTA_plasma	501	246	655816	2.80293e-06	9.9999e-06	positive	4.64615e-06
identifier#83	CYC4	EDTA_plasma	501	4	391225	2.35512e-06	0.000299997	negative	7.78839e-06
identifier#84	EOT	EDTA_plasma	501	32	544735	2.9111e-06	9.9999e-06	positive	5.59358e-06
identifier#85	CYC2	EDTA_plasma	233	0	209237	2.44739e-06	1	negative	1.45625e-05
identifier#86	CYC4	EDTA_plasma	233	0	357942	1.7931e-06	1	negative	8.51259e-06
identifier#87	EOT	EDTA_plasma	233	14	147744	4.87678e-06	9.9999e-06	positive	2.06235e-05
identifier#88	FU3Mo	EDTA_plasma	233	3797	127461	3.22504e-06	9.9999e-06	positive	2.39053e-05
identifier#89	FU6Mo	EDTA_plasma	233	1745	151679	3.71004e-06	9.9999e-06	positive	2.00884e-05
identifier#90	CYC2	EDTA_plasma	263	4	262933	3.01008e-06	0.00461995	negative	1.15885e-05
identifier#91	EOT	EDTA_plasma	263	0	263337	2.50149e-06	1	negative	1.15708e-05
identifier#92	FU12Mo	STRECK_plasma	263	0	185476	2.55598e-06	1	negative	1.6428e-05
identifier#93	FU24Mo	STRECK_plasma	263	1	203998	2.20445e-06	0.00181998	negative	1.49364e-05
identifier#94	FU3Mo	EDTA_plasma	263	0	186266	4.04912e-06	1	negative	1.63583e-05
identifier#95	FU6Mo	EDTA_plasma	263	0	187663	2.43625e-06	1	negative	1.62366e-05
identifier#96	CYC2	EDTA_plasma	370	1	121296	3.29759e-06	0.098749	negative	2.51203e-05
identifier#97	EOT	EDTA_plasma	370	0	206385	2.07269e-06	1	negative	1.47637e-05
identifier#98	CYC2	EDTA_plasma	542	0	464901	3.56225e-06	1	negative	6.55412e-06
identifier#99	CYC2	EDTA_plasma	888	0	611549	2.67534e-06	1	negative	4.98246e-06
identifier#100	EOT	EDTA_plasma	888	1	1467529	1.65202e-06	0.140439	negative	2.07629e-06
identifier#101	CYC2	EDTA_plasma	124	2	71448	5.83072e-06	0.00725993	negative	4.26458e-05
identifier#102	EOT	EDTA_plasma	124	0	107325	8.38363e-06	1	negative	2.83902e-05
identifier#103	CYC2	EDTA_plasma	281	0	241353	1.89475e-06	1	negative	1.26247e-05
identifier#104	EOT	EDTA_plasma	281	0	304804	3.6542e-06	1	negative	9.99662e-06
identifier#105	CYC2	EDTA_plasma	348	9	278430	2.67255e-06	9.9999e-06	positive	1.09435e-05
identifier#106	CYC2	EDTA_plasma	196	1	178707	2.76957e-06	0.115999	negative	1.70503e-05
identifier#107	CYC4	EDTA_plasma	196	0	212098	1.47017e-06	1	negative	1.4366e-05
identifier#108	EOT	EDTA_plasma	196	0	165916	3.31881e-06	1	negative	1.83647e-05
identifier#109	CYC2	EDTA_plasma	117	0	44351	3.84602e-06	1	negative	6.87002e-05
identifier#110	EOT	EDTA_plasma	117	0	54842	6.61231e-06	1	negative	5.55585e-05
identifier#111	CYC2	EDTA_plasma	219	0	188530	1.90779e-06	1	negative	1.61619e-05
identifier#112	EOT	STRECK_plasma	219	1	212446	1.57499e-06	0.0495495	negative	1.43425e-05
identifier#113	CYC2	EDTA_plasma	127	106	71351	3.75945e-06	9.9999e-06	positive	4.27038e-05
identifier#114	CYC4	EDTA_plasma	127	749	42910	2.99474e-06	9.9999e-06	positive	7.10072e-05
identifier#115	EOT	STRECK_plasma	127	1011	106848	3.18689e-06	9.9999e-06	positive	2.8517e-05
identifier#116	CYC2	EDTA_plasma	142	1	107554	3.15835e-06	0.000429996	negative	2.83298e-05
identifier#117	EOT	EDTA_plasma	142	1	145913	6.63095e-06	0.215768	negative	2.08823e-05
identifier#118	CYC2	EDTA_plasma	439	14	263986	2.67478e-06	9.9999e-06	positive	1.15423e-05
identifier#119	CYC4	STRECK_plasma	439	0	259743	1.77105e-06	1	negative	1.17309e-05
identifier#120	EOT	EDTA_plasma	439	0	360497	3.35753e-06	1	negative	8.45226e-06
identifier#121	CYC2	STRECK_plasma	326	9	245627	1.88668e-06	9.9999e-06	positive	1.2405e-05
identifier#122	CYC4	STRECK_plasma	326	0	108953	1.75627e-06	1	negative	2.7966e-05
identifier#123	EOT	EDTA_plasma	326	2	165421	4.2267e-06	0.00435996	negative	1.84197e-05
identifier#124	FU12Mo	STRECK_plasma	326	0	117282	2.49277e-06	1	negative	2.598e-05
identifier#125	CYC2	STRECK_plasma	72	0	57863	4.28563e-06	1	negative	5.26579e-05
identifier#126	EOT	EDTA_plasma	72	1	80193	3.73151e-06	0.0526395	negative	3.79954e-05
identifier#127	FU12Mo	STRECK_plasma	72	0	43787	2.04283e-06	1	negative	6.9585e-05
identifier#128	CYC2	EDTA_plasma	442	1	1158200	2.24961e-06	0.255347	negative	2.63083e-06
identifier#129	CYC4	STRECK_plasma	442	0	306951	1.56324e-06	1	negative	9.9267e-06
identifier#130	EOT	EDTA_plasma	442	3	316100	3.15098e-06	0.00468995	negative	9.63939e-06
identifier#131	FU3Mo	STRECK_plasma	442	691	322663	3.86251e-06	9.9999e-06	positive	9.44332e-06
identifier#132	CYC2	EDTA_plasma	306	2876	172007	2.75265e-06	9.9999e-06	positive	1.77144e-05
identifier#133	CYC4	STRECK_plasma	306	44	114291	1.93414e-06	9.9999e-06	positive	2.66599e-05
identifier#134	EOT	EDTA_plasma	306	0	97942	3.44587e-06	1	negative	3.111e-05
identifier#135	FU12Mo	STRECK_plasma	306	0	75052	2.22149e-06	1	negative	4.0598e-05
identifier#136	FU24Mo	STRECK_plasma	306	0	30603	2.68076e-06	1	negative	9.95613e-05
identifier#137	FU3Mo	STRECK_plasma	306	0	68575	2.81808e-06	1	negative	4.44325e-05
identifier#138	CYC2	STRECK_plasma	39	0	21767	7.81213e-06	1	negative	0.000139974
identifier#139	EOT	EDTA_plasma	39	0	29742	7.45334e-06	1	negative	0.000102443
identifier#140	CYC2	STRECK_plasma	395	533	344362	2.81863e-06	9.9999e-06	positive	8.84828e-06
identifier#141	CYC4	STRECK_plasma	395	0	548488	1.13822e-06	1	negative	5.5553e-06
identifier#142	EOT	EDTA_plasma	395	10	275843	3.67297e-06	9.9999e-06	positive	1.10462e-05
identifier#143	FU3Mo	STRECK_plasma	395	31237	150728	2.34058e-06	9.9999e-06	positive	2.02152e-05
identifier#144	FU6Mo	STRECK_plasma	395	7	216733	2.54071e-06	9.9999e-06	positive	1.40588e-05
identifier#145	PD	STRECK_plasma	395	28895	156171	2.73983e-06	9.9999e-06	positive	1.95106e-05
identifier#146	CYC2	STRECK_plasma	47	120	42714	3.12733e-06	9.9999e-06	positive	7.1333e-05
identifier#147	CYC2	STRECK_plasma	241	228	303928	2.62603e-06	9.9999e-06	positive	1.00254e-05
identifier#148	CYC4	STRECK_plasma	241	0	223668	1.38673e-06	1	negative	1.36229e-05
identifier#149	EOT	STRECK_plasma	241	0	181267	3.59356e-06	1	negative	1.68095e-05
identifier#150	FU12Mo	STRECK_plasma	241	1	308630	1.52313e-06	0.0686893	negative	9.8727e-06
identifier#151	FU24Mo	STRECK_plasma	241	13	165196	3.29088e-06	9.9999e-06	positive	1.84447e-05
identifier#152	FU3Mo	STRECK_plasma	241	1	234750	2.05576e-06	0.0839392	negative	1.29798e-05
identifier#153	FU6Mo	STRECK_plasma	241	1	336940	1.65106e-06	0.0705793	negative	9.04319e-06
identifier#154	CYC2	STRECK_plasma	200	85	153899	2.98044e-06	9.9999e-06	positive	1.97987e-05
identifier#155	EOT	STRECK_plasma	200	8	331347	2.33826e-06	9.9999e-06	positive	9.19583e-06
identifier#156	FU12Mo	STRECK_plasma	200	13	142594	1.65165e-06	9.9999e-06	positive	2.13683e-05
identifier#157	FU3Mo	STRECK_plasma	200	34	137829	1.99098e-06	9.9999e-06	positive	2.2107e-05
identifier#158	FU6Mo	STRECK_plasma	200	8	242631	1.21649e-06	9.9999e-06	positive	1.25582e-05
identifier#159	FU9Mo	STRECK_plasma	200	27	165175	1.41854e-06	9.9999e-06	positive	1.84471e-05
identifier#160	PD	STRECK_plasma	200	27	45458	3.28843e-06	9.9999e-06	positive	6.70272e-05
identifier#161	CYC2	STRECK_plasma	205	4	181264	2.50483e-06	0.000409996	negative	1.68097e-05
identifier#162	EOT	STRECK_plasma	205	0	212327	3.38367e-06	1	negative	1.43505e-05
identifier#163	CYC2	STRECK_plasma	413	34	381036	2.31697e-06	9.9999e-06	positive	7.99665e-06
identifier#164	CYC4	STRECK_plasma	413	0	456012	1.82686e-06	1	negative	6.68188e-06
identifier#165	EOT	STRECK_plasma	413	0	383773	2.7615e-06	1	negative	7.93962e-06
identifier#166	CYC2	STRECK_plasma	152	0	65700	5.25532e-06	1	negative	4.63768e-05
identifier#167	EOT	STRECK_plasma	152	0	74551	5.33043e-06	1	negative	4.08709e-05
identifier#168	CYC2	STRECK_plasma	540	3	461309	2.35541e-06	0.000159998	negative	6.60515e-06
identifier#169	CYC4	STRECK_plasma	540	5	860709	2.04901e-06	6.99993e-05	positive	3.54013e-06
identifier#170	EOT	STRECK_plasma	540	0	756238	2.76537e-06	1	negative	4.02918e-06
identifier#171	CYC2	STRECK_plasma	603	3	542580	1.63885e-06	0.0241098	negative	5.61579e-06
identifier#172	EOT	STRECK_plasma	603	2	446342	4.9002e-06	0.0335397	negative	6.82664e-06
identifier#173	CYC2	STRECK_plasma	852	0	616776	2.92359e-06	1	negative	4.94023e-06
identifier#174	EOT	STRECK_plasma	852	1	457633	3.24136e-06	0.131289	negative	6.65821e-06
identifier#175	CYC2	EDTA_plasma	237	112	182984	3.93532e-06	9.9999e-06	positive	1.66517e-05
identifier#176	CYC4	EDTA_plasma	237	1	68976	2.73867e-06	0.0256697	negative	4.41742e-05
identifier#177	EOT	EDTA_plasma	237	0	438825	2.48504e-06	1	negative	6.94358e-06
identifier#178	FU12Mo	EDTA_plasma	237	664	100154	3.63141e-06	9.9999e-06	positive	3.04229e-05
identifier#179	FU3Mo	EDTA_plasma	237	4	269226	1.11261e-06	9.9999e-05	negative	1.13177e-05
identifier#180	FU6Mo	EDTA_plasma	237	1	285059	1.76808e-06	0.00266997	negative	1.0689e-05
identifier#181	FU9Mo	EDTA_plasma	237	232	96264	3.99201e-06	9.9999e-06	positive	3.16523e-05
identifier#182	PD	EDTA_plasma	237	2307	105944	3.28835e-06	9.9999e-06	positive	2.87603e-05
identifier#183	CYC2	EDTA_plasma	129	0	116208	2.32487e-06	1	negative	2.62201e-05
identifier#184	CYC4	EDTA_plasma	129	0	48309	1.78873e-06	1	negative	6.30717e-05
identifier#185	EOT	EDTA_plasma	129	0	79690	2.6872e-06	1	negative	3.82353e-05
identifier#186	CYC2	EDTA_plasma	613	1	474923	2.55803e-06	0.169278	negative	6.41581e-06
identifier#187	EOT	EDTA_plasma	613	1	907934	1.73756e-06	0.357126	negative	3.35599e-06
identifier#188	CYC2	EDTA_plasma	1316	252	984394	4.15962e-06	9.9999e-06	positive	3.09533e-06
identifier#189	CYC4	EDTA_plasma	1316	18	605323	1.80883e-06	9.9999e-06	positive	5.03371e-06
identifier#190	EOT	EDTA_plasma	1316	3	694484	2.3107e-06	0.00096999	negative	4.38746e-06
identifier#191	CYC2	EDTA_plasma	160	84	104865	5.12055e-06	9.9999e-06	positive	2.90562e-05
identifier#192	CYC4	EDTA_plasma	160	38	282369	2.16426e-06	9.9999e-06	positive	1.07909e-05
identifier#193	EOT	EDTA_plasma	160	3	58096	8.29289e-06	3.99996e-05	positive	5.24467e-05
identifier#194	FU1Mo	EDTA_plasma	160	6	98744	6.66974e-06	9.9999e-06	positive	3.08574e-05
identifier#195	FU3Mo	EDTA_plasma	160	95	65841	7.56568e-06	9.9999e-06	positive	4.62775e-05
identifier#196	FU6Mo	EDTA_plasma	160	1174	78525	3.15694e-06	9.9999e-06	positive	3.88025e-05
identifier#197	CYC4	EDTA_plasma	69	0	26707	1.84139e-06	1	negative	0.000114084
identifier#198	CYC2	STRECK_plasma	549	2	804419	2.22164e-06	0.0475495	negative	3.78785e-06
identifier#199	CYC4	STRECK_plasma	549	3	790119	2.63632e-06	0.0557394	negative	3.85641e-06
identifier#200	EOT	STRECK_plasma	549	0	1071103	2.18018e-06	1	negative	2.84475e-06
identifier#201	EOT	STRECK_plasma	145	1	42351	5.49539e-06	0.0218298	negative	7.19444e-05
identifier#202	CYC4	STRECK_plasma	162	0	149132	1.74044e-06	1	negative	2.04315e-05
identifier#203	CYC2	EDTA_plasma	74	0	73700	3.28925e-06	1	negative	4.13428e-05
identifier#204	CYC4	EDTA_plasma	74	0	69689	1.49111e-06	1	negative	4.37222e-05
identifier#205	EOT	EDTA_plasma	74	0	114108	1.95942e-06	1	negative	2.67026e-05
identifier#206	FU12Mo	STRECK_plasma	74	0	43233	3.68531e-06	1	negative	7.04767e-05
identifier#207	FU18Mo	STRECK_plasma	74	30	48686	4.68653e-06	9.9999e-06	positive	6.25833e-05
identifier#208	FU24Mo	STRECK_plasma	74	132	43676	3.98653e-06	9.9999e-06	positive	6.97619e-05
identifier#209	FU6Mo	EDTA_plasma	74	0	56128	3.73487e-06	1	negative	5.42856e-05
identifier#210	FU9Mo	STRECK_plasma	74	5	36923	4.53455e-06	9.9999e-06	positive	8.25204e-05
identifier#211	CYC2	EDTA_plasma	156	0	171237	2.81354e-06	1	negative	1.7794e-05
identifier#212	EOT	EDTA_plasma	156	0	151192	1.82438e-06	1	negative	2.01531e-05
identifier#213	CYC2	EDTA_plasma	373	1	303692	2.79155e-06	0.185408	negative	1.00332e-05
identifier#214	EOT	EDTA_plasma	373	3	835089	1.92002e-06	0.0479295	negative	3.64874e-06
identifier#215	CYC2	EDTA_plasma	173	0	210399	1.85057e-06	1	negative	1.4482e-05
identifier#216	EOT	EDTA_plasma	173	12	72128	1.59263e-06	9.9999e-06	positive	4.22438e-05
identifier#217	CYC2	EDTA_plasma	Genotyping Failed	NA	NA	NA	NA	negative	NA
identifier#218	EOT	EDTA_plasma	Genotyping Failed	NA	NA	NA	NA	negative	NA
identifier#219	CYC2	STRECK_plasma	339	1	209393	2.78254e-06	0.0342197	negative	1.45516e-05
identifier#220	EOT	STRECK_plasma	339	0	188459	1.63284e-06	1	negative	1.6168e-05
identifier#221	CYC2	EDTA_plasma	326	0	301685	4.29325e-06	1	negative	1.01e-05
identifier#222	CYC2	EDTA_plasma	451	2	181151	1.09391e-05	0.0376796	negative	1.68202e-05
identifier#223	EOT	EDTA_plasma	451	0	561540	4.29164e-06	1	negative	5.42618e-06
identifier#224	CYC2	EDTA_plasma	208	222	202080	4.86433e-06	9.9999e-06	positive	1.50782e-05
identifier#225	CYC4	EDTA_plasma	208	7	179829	2.60181e-06	9.9999e-06	positive	1.69439e-05
identifier#226	EOT	EDTA_plasma	208	0	204927	1.86142e-06	1	negative	1.48687e-05
identifier#227	FU3Mo	STRECK_plasma	208	0	173260	2.85878e-06	1	negative	1.75863e-05
identifier#228	FU6Mo	STRECK_plasma	208	45	126098	4.68091e-06	9.9999e-06	positive	2.41637e-05
identifier#229	CYC2	STRECK_plasma	63	0	46563	2.56321e-06	1	negative	6.54366e-05
identifier#230	CYC4	STRECK_plasma	63	0	47773	1.55998e-06	1	negative	6.37793e-05
identifier#231	EOT	STRECK_plasma	63	0	41085	2.47899e-06	1	negative	7.41612e-05
identifier#232	CYC2	EDTA_plasma	253	310	213124	2.36601e-06	9.9999e-06	positive	1.42969e-05
identifier#233	CYC4	EDTA_plasma	253	0	218415	1.65763e-06	1	negative	1.39505e-05
identifier#234	EOT	EDTA_plasma	253	2	200708	2.36723e-06	0.00455995	negative	1.51813e-05
identifier#235	CYC2	EDTA_plasma	369	0	351668	1.60179e-06	1	negative	8.66446e-06
identifier#236	FU12Mo	EDTA_plasma	369	0	246514	1.67047e-06	1	negative	1.23604e-05
identifier#237	FU24Mo	STRECK_plasma	369	0	299706	2.18959e-06	1	negative	1.01667e-05
identifier#238	FU3Mo	EDTA_plasma	369	0	248674	2.25996e-06	1	negative	1.2253e-05
identifier#239	FU6Mo	EDTA_plasma	369	0	180467	3.13208e-06	1	negative	1.6884e-05
identifier#240	CYC2	EDTA_plasma	399	1	228874	5.35644e-06	0.257357	negative	1.3313e-05
identifier#241	CYC4	EDTA_plasma	399	0	141467	2.63277e-06	1	negative	2.15385e-05
identifier#242	EOT	EDTA_plasma	399	1	210840	5.39668e-06	0.304967	negative	1.44517e-05
identifier#243	CYC2	EDTA_plasma	596	0	397791	3.59418e-06	1	negative	7.65984e-06
identifier#244	CYC4	EDTA_plasma	596	0	136749	1.66879e-06	1	negative	2.22816e-05
identifier#245	EOT	EDTA_plasma	596	0	38902	3.18372e-07	1	negative	7.83226e-05
identifier#246	CYC2	EDTA_plasma	129	5	138302	2.22709e-06	9.9999e-06	positive	2.20314e-05
identifier#247	CYC4	EDTA_plasma	129	0	234125	1.63448e-06	1	negative	1.30144e-05
identifier#248	EOT	EDTA_plasma	129	0	162478	2.5911e-06	1	negative	1.87533e-05
identifier#249	FU3Mo	EDTA_plasma	129	0	57325	4.86972e-06	1	negative	5.31521e-05
identifier#250	CYC2	EDTA_plasma	203	0	119121	3.17845e-06	1	negative	2.55789e-05
identifier#251	CYC2	EDTA_plasma	86	0	133268	5.75411e-06	1	negative	2.28636e-05
identifier#252	CYC4	EDTA_plasma	86	0	55720	3.0367e-06	1	negative	5.46831e-05
identifier#253	EOT	EDTA_plasma	86	0	142605	3.57269e-06	1	negative	2.13667e-05
identifier#254	CYC2	EDTA_plasma	116	2	175874	2.91925e-06	0.00183998	negative	1.73249e-05
identifier#255	CYC4	EDTA_plasma	116	1	259230	1.14252e-06	0.0606794	negative	1.17541e-05
identifier#256	EOT	EDTA_plasma	116	1	11299	1.54491e-06	0.00497995	negative	0.000269636
identifier#257	FU12Mo	STRECK_plasma	116	0	79401	2.92067e-06	1	negative	3.83744e-05
identifier#258	FU18Mo	STRECK_plasma	116	0	76554	2.41439e-06	1	negative	3.98015e-05
identifier#259	FU3Mo	EDTA_plasma	116	0	80750	3.92756e-06	1	negative	3.77334e-05
identifier#260	FU6Mo	EDTA_plasma	116	1	86818	3.97686e-06	0.0579794	negative	3.50961e-05
identifier#261	FU9Mo	STRECK_plasma	116	0	51463	4.79218e-06	1	negative	5.92063e-05
identifier#262	CYC4	EDTA_plasma	232	11182	99760	3.77257e-06	9.9999e-06	positive	3.05431e-05
identifier#263	CYC2	EDTA_plasma	275	0	191874	1.65465e-06	1	negative	1.58802e-05
identifier#264	EOT	EDTA_plasma	275	1	414370	1.45527e-06	0.0426196	negative	7.35337e-06
identifier#265	CYC2	EDTA_plasma	364	0	374007	3.4849e-06	1	negative	8.14694e-06
identifier#266	EOT	EDTA_plasma	364	0	148559	3.28455e-06	1	negative	2.05103e-05
identifier#267	CYC2	EDTA_plasma	344	0	260715	2.02912e-06	1	negative	1.16871e-05
identifier#268	EOT	EDTA_plasma	344	0	119373	3.1653e-06	1	negative	2.55249e-05
identifier#269	CYC2	EDTA_plasma	126	1	131970	4.17441e-06	0.0384296	negative	2.30885e-05
identifier#270	EOT	EDTA_plasma	126	0	75990	2.04813e-06	1	negative	4.00969e-05
identifier#271	CYC2	EDTA_plasma	233	2	158917	1.84615e-06	0.00159998	negative	1.91735e-05
identifier#272	EOT	EDTA_plasma	233	0	366540	1.84455e-06	1	negative	8.31291e-06
identifier#273	CYC2	EDTA_plasma	160	576	119350	3.32711e-06	9.9999e-06	positive	2.55298e-05
identifier#274	CYC4	EDTA_plasma	160	623	151341	3.29333e-06	9.9999e-06	positive	2.01333e-05
identifier#275	EOT	STRECK_plasma	160	2953	63322	2.78392e-06	9.9999e-06	positive	4.81184e-05
identifier#276	CYC2	EDTA_plasma	26	26	28001	2.50094e-06	9.9999e-06	positive	0.000108813
identifier#277	CYC4	EDTA_plasma	26	62	25358	1.49192e-06	9.9999e-06	positive	0.000120153
identifier#278	EOT	STRECK_plasma	26	488	25653	2.1825e-06	9.9999e-06	positive	0.000118771
identifier#279	CYC2	STRECK_plasma	1041	269	594376	5.58956e-06	9.9999e-06	positive	5.12641e-06
identifier#280	CYC4	STRECK_plasma	1041	5	1092009	2.17488e-06	0.000949991	negative	2.79029e-06
identifier#281	EOT	STRECK_plasma	1041	3	890499	7.1256e-06	0.174228	negative	3.4217e-06
identifier#282	CYC2	STRECK_plasma	348	0	259777	2.85248e-06	1	negative	1.17293e-05
identifier#283	CYC2	STRECK_plasma	99	0	73906	3.57151e-06	1	negative	4.12275e-05
identifier#284	CYC2	STRECK_plasma	261	0	320833	1.90417e-06	1	negative	9.49719e-06
identifier#285	CYC2	STRECK_plasma	252	1	216291	1.65404e-06	0.0769792	negative	1.40875e-05
identifier#286	CYC4	STRECK_plasma	252	0	75580	1.35468e-06	1	negative	4.03144e-05
identifier#287	EOT	STRECK_plasma	252	0	285023	1.8074e-06	1	negative	1.06904e-05
identifier#288	CYC2	STRECK_plasma	177	0	304206	2.04964e-06	1	negative	1.00163e-05
identifier#289	CYC4	STRECK_plasma	177	0	70350	1.26564e-06	1	negative	4.33114e-05
identifier#290	EOT	STRECK_plasma	177	0	331326	2.11385e-06	1	negative	9.19642e-06
identifier#291	CYC2	STRECK_plasma	244	1044	235687	2.43748e-06	9.9999e-06	positive	1.29282e-05
identifier#292	CYC4	STRECK_plasma	244	247	367710	2.06811e-06	9.9999e-06	positive	8.28646e-06
identifier#293	EOT	STRECK_plasma	244	22163	118448	6.61062e-06	9.9999e-06	positive	2.57243e-05
identifier#294	CYC2	STRECK_plasma	Genotyping Failed	NA	NA	NA	NA	negative	NA
identifier#295	CYC4	STRECK_plasma	Genotyping Failed	NA	NA	NA	NA	negative	NA
identifier#296	EOT	STRECK_plasma	Genotyping Failed	NA	NA	NA	NA	negative	NA
identifier#297	CYC2	STRECK_plasma	479	265	123358	3.62886e-06	9.9999e-06	positive	2.47004e-05
identifier#298	CYC2	EDTA_plasma	405	719	375936	4.41618e-06	9.9999e-06	positive	8.10514e-06
identifier#299	CYC4	EDTA_plasma	405	0	370724	3.49687e-06	1	negative	8.21909e-06
identifier#300	EOT	EDTA_plasma	405	0	313960	2.52021e-06	1	negative	9.70509e-06
identifier#301	CYC2	EDTA_plasma	423	9	324682	2.48068e-06	9.9999e-06	positive	9.3846e-06
identifier#302	CYC4	EDTA_plasma	423	12	549726	1.66829e-06	9.9999e-06	positive	5.54279e-06
identifier#303	EOT	EDTA_plasma	423	0	675811	1.92895e-06	1	negative	4.50868e-06
identifier#304	CYC2	EDTA_plasma	307	0	242683	2.26925e-06	1	negative	1.25555e-05
identifier#305	CYC4	EDTA_plasma	307	1	536359	1.76564e-06	0.166708	negative	5.68093e-06
identifier#306	EOT	EDTA_plasma	307	0	166106	2.50625e-06	1	negative	1.83437e-05
identifier#307	CYC2	EDTA_plasma	277	0	183790	4.11113e-06	1	negative	1.65787e-05
identifier#308	EOT	EDTA_plasma	277	0	130114	4.30498e-06	1	negative	2.34178e-05
identifier#309	CYC2	EDTA_plasma	258	0	180028	2.46246e-06	1	negative	1.69251e-05
identifier#310	EOT	EDTA_plasma	258	0	140383	4.56437e-06	1	negative	2.17049e-05
identifier#311	CYC2	EDTA_plasma	292	0	380391	3.02465e-06	1	negative	8.01021e-06
identifier#312	EOT	EDTA_plasma	292	0	368538	4.04184e-06	1	negative	8.26784e-06
identifier#313	CYC2	EDTA_plasma	440	56	388952	3.22227e-06	9.9999e-06	positive	7.83391e-06
identifier#314	CYC4	STRECK_plasma	440	619	555897	1.32301e-06	9.9999e-06	positive	5.48126e-06
identifier#315	EOT	STRECK_plasma	440	0	358992	2.94555e-06	1	negative	8.48769e-06
identifier#316	CYC2	STRECK_plasma	216	1009	192936	4.4602e-06	9.9999e-06	positive	1.57928e-05
identifier#317	EOT	STRECK_plasma	216	0	107940	2.83517e-06	1	negative	2.82285e-05
identifier#318	CYC2	STRECK_plasma	380	0	342226	1.72982e-06	1	negative	8.90351e-06
identifier#319	EOT	STRECK_plasma	380	0	194275	3.33354e-06	1	negative	1.5684e-05
identifier#320	CYC2	EDTA_plasma	66	0	23429	3.18015e-06	1	negative	0.000130045
identifier#321	EOT	EDTA_plasma	66	0	23379	2.39923e-06	1	negative	0.000130323
identifier#322	CYC2	STRECK_plasma	440	4	603322	2.84946e-06	0.00244998	negative	5.0504e-06
identifier#323	CYC2	STRECK_plasma	203	266	134576	5.29147e-06	9.9999e-06	positive	2.26414e-05
identifier#324	CYC4	STRECK_plasma	203	96	78055	3.24379e-06	9.9999e-06	positive	3.90361e-05
